# Supplementary material for: Phage-delivered sensitisation with subsequent antibiotic treatment reveals sustained effect against antimicrobial resistant bacteria
Source: PubMed Central journal article supplement (PMC7255016; doi:10.7150/thno.42573), 2020-05-15
Supplement: thnov10p6310s1.pdf [file thnov10p6310s1.pdf]

# Supplementary materials

## Phage-delivered sensitisation with subsequent antibiotic treatment reveals sustained effect against antimicrobial resistant bacteria

Hongbo Liu<sup>1,2,†</sup>, Hao Li<sup>3,†</sup>, Yuan Liang<sup>2,†</sup>, Xinying Du<sup>2,†</sup>, Chaojie Yang<sup>2</sup>, Lang Yang<sup>1</sup>, Jing Xie<sup>2</sup>, Rongtao Zhao<sup>2</sup>, Yigang Tong<sup>4,\*</sup>, Shaofu Qiu<sup>2,\*</sup>, Hongbin Song<sup>1,2,\*</sup>

<sup>1</sup>Academy of Military Medical Sciences, 27 Taiping Road, Haidian District, Beijing 100850, China;

<sup>2</sup>The Centre for Infectious Disease Control, Chinese PLA Centre for Disease Control and Prevention, 20 Dongda Street, Fengtai District, Beijing 100071, China;

<sup>3</sup>State Key Laboratory of Pathogen and Biosecurity, Beijing Institute of Microbiology and Epidemiology, 20 Dongda Street, Fengtai District, Beijing 100071, China

<sup>4</sup>Beijing Advanced Innovation Center for Soft Matter Science and Engineering (BAIC-SM), College of Life Science and Technology, Beijing University of Chemical Technology, Beijing 100029, China

<sup>†</sup>These authors contributed equally to this article.

\*Corresponding Authors: hongbinsong@263.net (H.S.); qiushf0613@hotmail.com (S.Q.); tong.yigang@gmail.com (Y.T.).

**Figure S1. Eradication of *bla*<sub>NDM-1</sub> possessing plasmids using pCas9-N1**

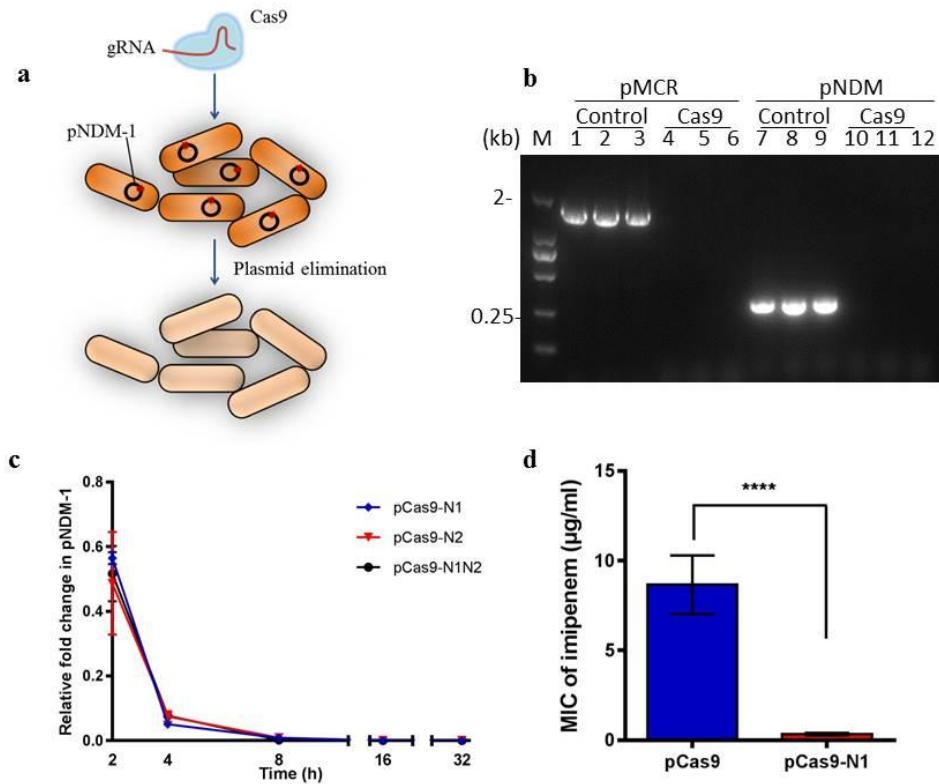

Sensitizing effect to antimicrobial resistant bacteria by CRISPR/Cas9 plasmid was determined *in vitro*. (a) The specific CRISPR/Cas9 plasmid was transformed into resistant *E.coli* J53 cells. (b) The specific CRISPR/Cas9 plasmids were delivered into J53 cells to target pNDM and pMCR. PCR detection of transformed colonies indicated that guided Cas9 enzyme could digest these resistant plasmids separately, controlled by pCas9 blank vector. (c) J53 pNDM-1 was sensitized using CRISPR/Cas9 plasmids targeting one site in *bla*<sub>NDM-1</sub> (pCas9-N1, pCas9-N2) or two sites (pCas9-N1N2). The relative fold change of pNDM-1 copies were determined at various time points by qPCR (n = 3, mean ± SD). Results revealed that targeted resistant plasmid was eliminated by over 99.9% after 8h. (d) Antimicrobial susceptibility test showed that MIC of imipenem of J53 pNDM-1 cells was obviously decreased after transformation of pCas9-N1 (unpaired t-test, n=3, p<0.001).

**Figure S2. Eliminate high-copy NDM-1 plasmid using pCas9-N1**

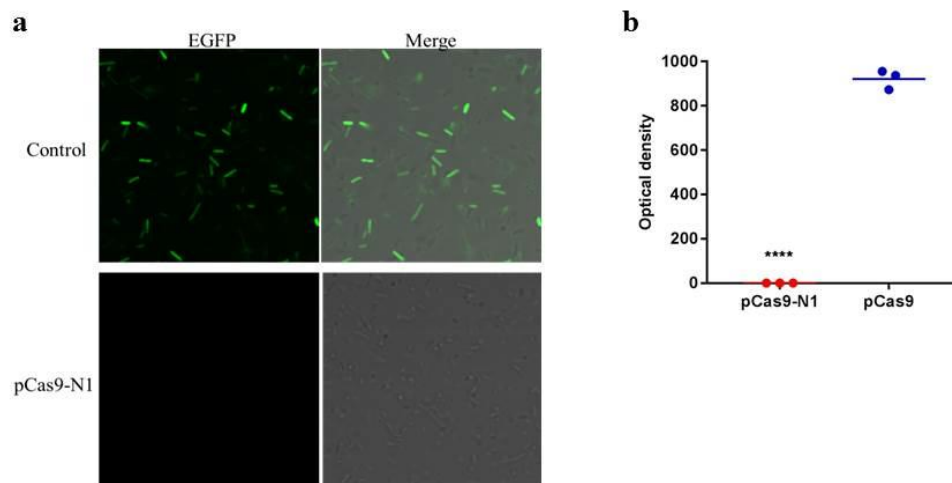

High-copy plasmids pEGFP-ndm co-expressed  $bla_{\text{NDM-1}}$  and *EGFP*. (a) The *E. coli* DH5 $\alpha$  pEGFP-ndm were transformed with pCas9-N1 and pCas9 control separately. EGFP signals were scanned by fluorescence confocal microscopy. EGFP signals were significantly quenched in pCas9-N1 group compared to those of the control. (b) The integrated optical fluorescent density decreased from  $921.5 \pm 24.99$  to 0 (unpaired *t*-test,  $P < 0.0001$ ,  $n = 3$ ), representing a decrease in  $bla_{\text{NDM-1}}$  of greater than 99.9%.

**Figure S3. PCR screening of dsDNA transformant colonies**

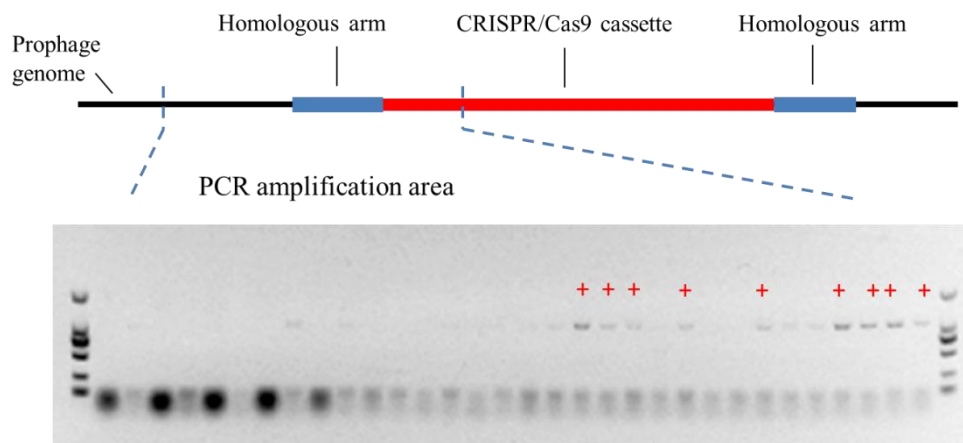

Colonies transformed with dsDNA were screened by PCR. The amplification flanked the upstream homologous arm. Using this screening strategy, colonies did not complete the recombination would show negative results in PCR screening, and transformants recombined with CRISPR/Cas9 cassette in prophage genome could be identified. Nine out of thirty-two colonies were identified as positive recombinant transformants by PCR detection. Positive rate was 28.1%.

**Figure S4. PCR examination to engineered genome of modified phage**

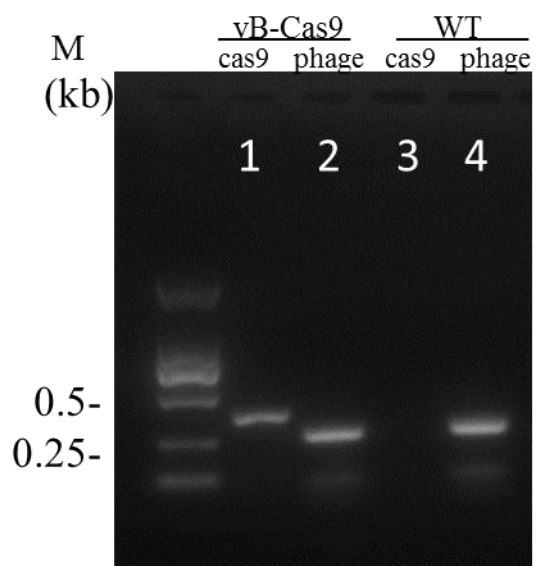

Genome-engineered phage was examined by PCR, compared with control. The vB\_Cas9 phage group (lane1, 2) showed positive for both cas9 gene and phage genome, while wild-type control (lane3, 4) was negative for cas9 sequence.

**Figure S5. Verification the integration of CRISPR/Cas9 in phage genome by PCR sequencing**

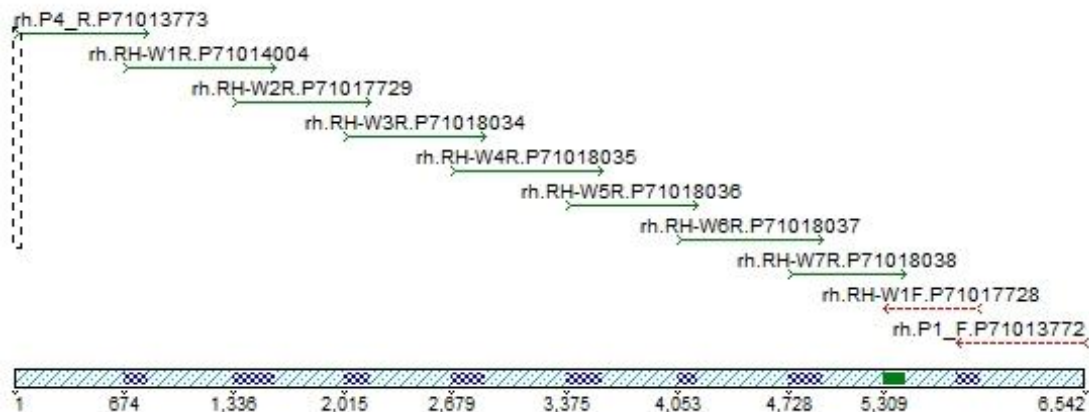

PCR sequencing of a 6.542 kb fragment in modified phage genome containing full length of CRISPR/Cas9 cassette (5.081 kb), also flanking full sequence of dsDNA donor for phage recombination. This whole fragment was assembled by results of ten sequencing reactions, and its sequence was displayed as below.

Assembled sequencing results:

```

ATTATATTTAGCCCTACCAGTGACAATAGCGTAACGGAAAACCTCGCCGCAT
CTTCTGCGGGCTTTGTTGGCTCGCTCCATTGCACCGCGATCTTCAAATCTGC
GGATTACTTCCAGCAGTTGCATCGGCTCAATATCCTGAATTTCAAGGCCGCC
GATGATAGGTA AAAATGTCGTCATCAAACATTTTTGCAAGTTCAGTTGCATAG
CCTACTGACCAGACTTGCTTCTTGTGCTCGTACCATTCTTGTA AATCGCAC
TAAAGGAATTGTTGTTAGACGAAGCCTTTTTCGCTTTTACCGGATCGATGCC
AACCGAGATGTCTTTCCTCGCGGTCCATGCTTTATCTCTTGCCTCCTGCAA
GTCATTAGCGGATATTTTCCTACGGTCAGGATTTTCTCCTTACCGTCAATCTT
GTAGCGAAGCTGCCATACCTTTTTCCCTGACACAGGGACATAAAGGTACAG
GCCATTACCATCGAGTAGGCGGTATGGTTTTTCTTTCGGCTTTGCTGCTTCA
ATCTGCTTAACGGTGAGCATGGGTAAA AATCCGGTGGGTAAAATTATTTTAT
CCACTTTTTACCGTCATGGAGTGCGGCTGTCAACGATCTGACGCGAACCA
TTACGAACTGTGAACACACTACTCTTCTTTTGCCTATTATAACATGAAAACG
CTTAAACAGAAAGAATAGGAAGGTATCCGACTGCTGGTATTAACCCTCTTTC
TCAAGTTATCATCGGCAATGTTGAATGGAGTCCATTCAA AACAGCATAGCTC
TAAAACATGGA ACTCAACAAGTCTCAGTGTGCTGAAGTTTTGGGACCATTC
AAAACAGCATAGCTCTAAAACGCTCAGCATCAATGCAGCGGCTAATGCGGT
GTTTTGGGACCATTCAA AACAGCATAGCTCTAAAACCTCGTAGACTATTTTT
GTCTAAAAAATTTTCGTAATCGCACTATTTGTCTCAGCTAGACTTCAGTCTTG
AAAAGCCCCTGTATTACTGCATTTATTAAGAGTATTATAACCATATTTTTAGTTA
TTAAGAAATAATCTTCATCTAAAATATACTTCAGTCACCTCCTAGCTGACTC
AAATCAATGCGTGTTTCATAAAGACCAGTGATGGATTGATGGATAAGAGTG
GCATCTAAA ACTTCTTTTGTAGACGTATATCGTTTACGATCAATTGTTGTATC
AAAATATTTAAAAGCAGCGGGAGCTCCAAGATTCGTCAACGTAAATAAATG
AATAATATTTTCTGCTTGTTACGTATTGGTTTGTCTCTATGTTTGTATATGC

```

ACTAAGAACTTTATCTAAATTGGCATCTGCTAAAATAACACGCTTAGAAAAT  
TCACTGATTTGCTCAATAATCTCATCTAAATAATGCTTATGCTGCTCCACAAA  
CAATTGTTTTTTGTTTCGTTATCTTCTGGACTACCCTTCAACTTTTCATAATGAC  
TAGCTAAATATAAAAAAATTCACATATTTGCTTGGCAGAGCCAGCTCATTTC  
TTTTTGTAATTCTCCGGCACTAGCCAGCATCCGTTTACGACCGTTTTCTAAC  
TCAAAAAGACTATATTTAGGTAGTTAATGATTAAGTCTTTTTTAACTTCCTT  
ATATCCTTTAGCTTCTAAAAAGTCAATCGGATTTTTTTTCAAAGGAACTTCTT  
TCCATAATTGTGATCCCTAGTAACTCTTTAACGGATTTTAACTTCTTCGATTT  
CCTTTTTTCCACCTTAGCAACCACTAGGACTGAATAAGCTACCGTTGGACTA  
TCAAACCACCATATTTTTTTGGATCCAGTCTTTTTTACGAGCAATAAGCT  
TGTCCGAATTTCTTTTTGGTAAAATTGACTCCTTGGAGAATCCGCCTGTCTG  
TACTTCTGTTTTCTTGACAATATTGACTTGGGGCATGGACAATACTTTGCGC  
ACTGTGGCAAATCTCGCCCTTATCCCAGACAATTTCTCCAGTTTCCCCAT  
TAGTTTCGATTAGAGGGCGTTTGCGAATCTCTCCATTTGCAAGTGTAATTC  
TGTTTTGAAGAAGTTCATGATATTAGAGTAAAAGAAATATTTTGC GGTTGCT  
TTGCCTATTTCTTGCTCAGACTTAGCAATCATTTTACGAACATCATAAATTT  
ATAATCACCATAGACAAACTCCGATTCAAGTTTTTGGATATTTCTTAATCAA  
GCAGTTCCAACGACGGCATTAGATACGCATCATGGGCATGATGGTAATTGT  
TAATCTCACGTACTTTATAGAATTGGAAATCTTTTCGGAAGTCAGAACTAA  
TTAGATTTTAAGGTAATCACTTTAACCTCTCGAATAAGTTTATCATTTTCAT  
CGTATTTAGTATTCATGCGACTATCCAAAATTTGTGCCACATGCTTAGTGATT  
TGGCGAGTTTCAACCAATTGGCGTTTGATAAAACCAGCTTTATCAAGTTCA  
CTCAAACCTCCACGTTACGCTTTCGTTAAATTATCAAACCTTACGTTGAGTGA  
TTAACTTGGCGTTTAGAAGTTGTCTCCAATAGTTTTTCATCTTTTTGACTACT  
TCTTCACTTGGAACGTTATCCGATTTACCACGATTTTTATCAGAACGCGTTA  
AGACCTTATTGTCTATTGAATCGTCTTTAAGGAACTTTGTGGAACAATGTG  
ATCGACATCATAATCACTTAAACGATTAATATCTAATTCTTGGTCCACATACA  
TGCTCTTCCATTTTGGAGATAATAGAGATAGAGCTTTTCATTTTGCAATTGA  
GTATTTTCAACAGGATGCTCTTTAAGAATCTGACTTCCTAATTCTTTGATACC  
TTCTTCGATTCGTTTCATACGCTCTCGCGAATTTTTCTGGCCCTTTTGAGTTG  
TCTGATTTTCACGTGCCATTTCAATAACGATATTTTCTGGCTTATGCCGCCCC  
ATTACTTTGACCAATTCATCAACAACCTTTTACAGTCTGTAAAATACCTTTTTT  
AATAGCAGGGCTACCAGCTAAATTTGCAATATGTTTCATGTAAACTATCGCCT  
TGTCCAGACACTTGTGCTTTTTGAATGTCTTCTTTAAATGTCAAACATCAT  
CATGGATCAGCTGCATAAAATTGCGATTGGCAAACCATCTGATTTCAAAA  
AATCTAATATTGTTTTGCCAGATTGCTTATCCCTAATACCATTAATCAATTTT  
GAGACAAACGTCCCCAACAGTATAACGGCGACGTTTAAAGCTGTTTCATCA  
CCTTATCATCAAAGAGGTGAGCATATGTTTTAAGTCTTTCCTCAATCATCTCC  
CTATCTTCAAATAAGGTCAATGTAAAACAATATCCTCTAAGATATCTTCATT  
TTCTTCATTATCCAAAAAATCTTTATCTTTAATAATTTTTAGCAAATCATGGTA  
GGTACCTAATGAAGCATTAAATCTATCTTCAACTCCTGAAATTTCAACACTA  
TCAAACATTCTATTTTTTTGAAATAATCTTCTTTAATTGCTTAACGGTTAC  
TTTTCGATTTGTTTTGAAGAGTAAATCAACAATGGCTTTCTTCTGTTACCT  
GAAAGAAATGCTGGTTTTTCGCATTCCTTCAGTAACATATTTGACCTTTGTCA

ATTCGTTATAAACCGTAAAATACTCATAAAGCAAACCTATGTTTTGGTAGTAC  
TTTTTCATTTGGAAGATTTTTATCAAAGTTTGTCATGCGTTCAATAAATGATT  
GAGCTGAAGCACCTTTATCGACAACCTTCTTCAAATTCATGGGGTAATTGT  
TTCTTCAGACTTCCGAGTCATCCATGCAAAACGACTATTGCCACGCGCCAA  
TGGACCAACATAATAAGGAATTCGAAAAGTCAAGATTTTTTCAATCTTCTCA  
CGATTGTCTTTTAAAAATGGATAAAAGTCTTCTTGTCTTCTCAAAATAGCAT  
GCAGCTCACCCAAGTGAATTTGATGGGGAATAGAGCCGTTGTCAAAGGTCC  
GTTGCTTGCGCAGCAAATCTTACGATTTAGTTTCACCAATAATTCTCAGT  
ACCATCCATTTTTTCTAAAATTGGTTTGATAAATTTATAAAATCTTCTTGGCT  
AGCTCCCCCATCAATATAACCTGCATATCCGTTTTTTGATTGATCAAAAAAG  
ATTTCTTTATACTTTTCTGGAAGTTGTTGTCGAACTAAAGCTTTTAAAAGAG  
TCAAGTCTTGATGATGTTTCATCGTAGCGTTAATCATTGAAGCTGATAGGGG  
AGCCTTAGTTATTTAGTATTTACTCTTAGGATATCTGAAAGTAAAATAGCAT  
CTGATAAATTCTTAGCTGCCAAAAACAAATCAGCATATTGATCTCCAATTTG  
CGCCAATAAATTATCTAAATCATCATCGTAAGTATCTTTTGAAAGCTGTAATT  
TAGCATCTTCTGCCAAATCAAATTTGATTTAAAATTAGGGGTCAAACCCAA  
TGACAAAGCAATGAGATTCCCAAATAAGCCATTTTTCTTCTCACCGGGGAG  
CTGAGCAATGAGATTTTCTAATCGTCTTGATTTACTCAATCGTGCAGAAAGA  
ATCGCTTTAGCATCTACTCCACTTGCCTTAATAGGGTTTTCTTCAAATAATTG  
ATTGTAGGTTTGTACCAACTGGATAAATAGTTTGTCCACATCACTATTATCAG  
GATTTAAATCTCCCTCAATCAAAAAATGACCACGAACTTAATCATATGCGC  
TAAGGCCAAATAGATTAAGCGCAAATCCGCTTTATCAGTAGAATCTACCAAT  
TTTTTTCGCAGATGATAGATAGTTGGATATTTCTCATGATAAGCAACTTCATC  
TACTATATTTCCAAAAATAGGATGACGTTTCATGCTTCTTGTCTTCTTCCACCA  
AAAAAGACTCTTCAAGTCGATGAAAGAACTATCATCTACTTTCCGCTCT  
CATTTGAAAAAATCTCCTGTAGATAACAAATACGATTCTTCCGACGTGTATA  
CCTTCTACGAGCTGTCCGTTTGAGACGAGTCGCTTCCGCTGTCTCTCCACT  
GTCAAATAAAAGAGCCCCCTATAAGATTTTTTTTTGATACTGTGGCGGTCTGTA  
TTTCCCAGAACCTTGAACTTTTTAGACGGAACCTTATATTCATCAGTGATCA  
CCGCCATCCGACGCTATTTGTGCCGATATCTAAGCCTATTGAGTATTTCTTA  
TCCATTTTTGCCTCCTAAAATAAAAAGTTTAAATTAATCCATAATGAGTTTG  
ATGATTTCAATAATAGTTTTAATGACCTCCGAAATTAGTTTAAATATGCTTTAAT  
TTTTCTTTTTCAAATATCTTCTTCAAAAAATATTACCCAATACTTAATAATAAA  
TAGATTATAACACAAAATTCTTTTAAAAAGTAGTTTATTTTGTATCATTCTAT  
AGTATTAAGTATTGTTTTATGGCTGATAAATTTCTTTGAATTTCTCCTTGATTA  
TTTGTATAAAAAGTTATAAAAATAATCTTGTTGGAACCATTCAAACAGCATA  
GCAAGTTAAAATAAGGCTAGTCCGTTATCAACTTGAAAAAGTGGCACCGAG  
TCGGTGCTTTTTTTGATACTTCTATTCTACTCTGACTGCAAACCAAAAAAAC  
AAGCGCTTTCAAACGCTTGTTTTATCATTTTTAGGGAAATTAATCTCTTAAT  
CCTTTTATCATTCTACATTTAGGGCGCTGCCATCTTGCTAAACCTACTAAGCTC  
CACAGGATGATTTTCGTAGGGCCCTCATCGCCATTGCTCCCCAAATACAAAA  
CCAATTTAGCCAGTGCCTCGTCCATTTTTTCGATGAACTCCGGCACCATCT  
CGTCAAACCTCGCCATGACTTTTTCAATCCGCTCAATCACGACATAATGCAG  
GCCTTCACGCTTCATGCGCGGGTCATAGTTGGCAAAGTACCAGGCATCTTT



TCGCGTCACCCACATGCTGTACTGCACCTGGGCCATGTAAGCCGATTTTATT  
GCCTCGAAACCACCGAGCCGGAATTCATGAAATCCCGGGAGGTAAACGG  
GCATTTAGTTCAAGGCCGTTGCCGTCCTGCATAAACCATCGGGAGAGCA  
GGCGGTGCGCATATTTTCGTCGCGATAGATGATCGGGGATTCAGTAATATTC  
ACGCCGGAAGTGAATTCAAACAGGGTTCTGGCGTCGTTCTCGTACTGTTTT  
CCCCAGGCCAGCGCCTTAGCATTAACTTCCGGAGCCACACCCGGTGCAAAC  
CTCAGCCAGCAGGGTGTGGAAGTAGGACATTTTCATGTCAGGCCACTTCTT  
TCCTGAGCGGGGCTTTGCTATCACGTTGTGAACTTCTGAAGCGGTGATGAC  
GCCGAGCCGTAATTTGTGCCATGCATCATCCCCCTGTTTCGACAGCTCTCACG  
TCGATCCCGGTACGCTGCAGGATAATGTCCGGTGTCATGCTGCCACCTTCTG  
CTCAGTGGCTTTCTGTTTCAGGAATCCAAGAGCTTTCCTGCTTCGGCCTG  
TGTCAGTTCTGACGATGCGCGAATGTCGCGGCGAAATATCTGGGAACAGAG  
CGGCAATAAGTCGTCATCCCA

**Figure S6. Phage plaque test of MG1655 cells separated from phage treatments during 240 h observation**

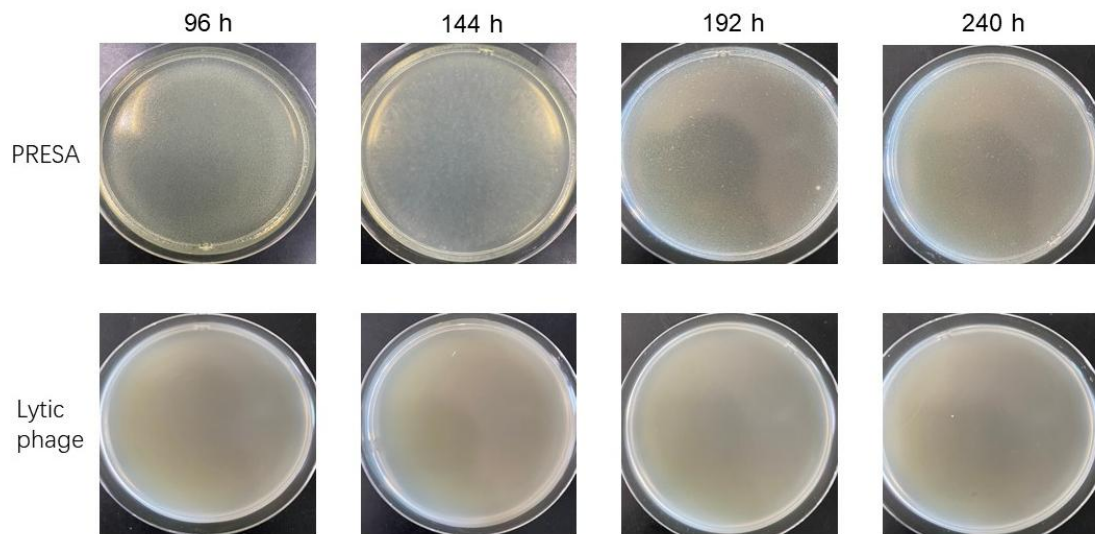

Host strain of phage plaque test were arranged using bacterial cells separating from the 240-hour in-vitro surveillance in different time points, to demonstrate the development of resistance of corresponding phages. Photos above represents the result of vB\_253 plaque, which host strain were from the lytic phage treatment strategy. No forming plaque were found in this test. Photos below represents the result of SSC induced vB\_Cas9 plaques, which host strain were from the vB\_Cas9&Kan group. Even the rarely remaining cells in 192-hour treatment were also sensitive to phage infection.

**Figure S7. Phage plaque test of MG1655 cells separated from phage treatments in mice skin.**

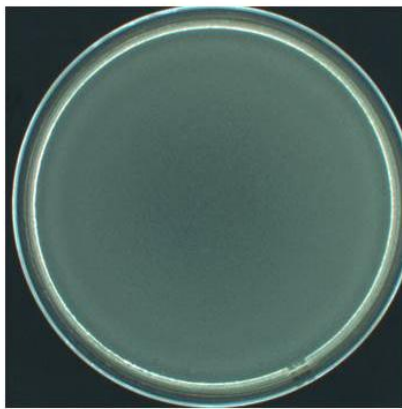

**Lytic phage strategy**

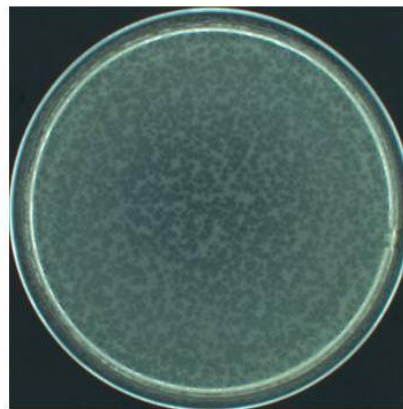

**Combinatory strategy**

Phage plaque test were arranged using bacterial cells separating from the mice skin model in day 6, to demonstrate the development of resistance of corresponding phages in vivo. Left photo represent the result of vB\_253 plaque, with host strain from the lytic phage strategy treatment. No forming plaque were found in this test, indicating the developed resistance to lytic phage of separated bacteria. Right photo represent the result of SSC induced vB\_Cas9 plaques, which host strain were from the vB\_Cas9&Kan group. The remaining bacteria were also sensitive to phage infection.

**Figure S8. Phage plaque test of MG1655 cells separated from phage treatments in mice intestine.**

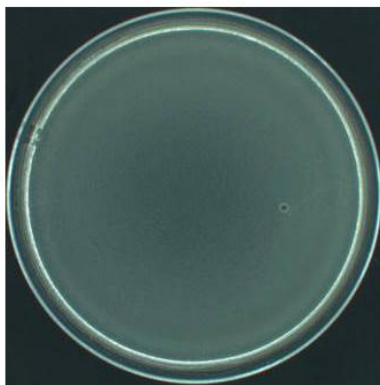

**Lytic phage strategy**

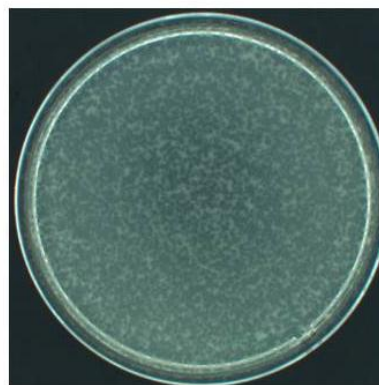

**Combinatory strategy**

Phage plaque test were arranged using bacterial cells separating from the mice intestine in day 7, to demonstrate the development of resistance of corresponding phages in vivo. Left photo represent the result of vB\_253 plaque, whose host strain were from the lytic phage strategy treatment. No forming plaque were observed, indicating the developed resistance to lytic phage of separated bacteria. Right photo represent the result of SSC induced vB\_Cas9 plaques, which host strain were from the vB\_Cas9&Kan group. The remaining bacteria showed no phage resistance.

**Table S1. Primers in this research**

| Primers     | Sequence (5'-3')                                                  | Use                                                     |
|-------------|-------------------------------------------------------------------|---------------------------------------------------------|
| ndm300-F    | GGCGGAATGGCTCATCACGA                                              | detection of <i>bla</i> NDM-1                           |
| ndm300-R    | CGCAACACAGCCTGACTTTC                                              | detection of <i>bla</i> NDM-1                           |
| NDM1001-F   | CGGTCGACCACCTCATGTTTG<br>AATTCGC                                  | detection of <i>bla</i> NDM-1                           |
| NDM1001-R   | CCCTCTAGACTCTGTCACATC<br>GAAATCGC                                 | detection of <i>bla</i> NDM-1                           |
| 16s-F       | AGAGTTTGATCCTGGCTCAG                                              | determination of reference gene                         |
| 16s-R       | CTGCTGCCTCCCGTAGGAGT                                              | determination of reference gene                         |
| spacer-F    | AACACGCATTGATTTGAG                                                | detection of CRISPR loci                                |
| spacer-R    | ATAGGAAGGTATCCGACT                                                | detection of CRISPR loci                                |
| N1Kana-F    | GTCGACACCGCATTAGCCGC<br>TGCATTGATGCTGAGCAGGG<br>CGCAAGGGCTGCTAAAG | amplification of KanR gene with target and PAM sequence |
| N1Kana-R    | GGATCCTCAGAAGAAGTCTCGT<br>CAAGAAGGC                               | amplification of KanR gene with target and PAM sequence |
| Kana-F      | AGCGTCTGACTCAGGGCGCAA<br>GGGCTGCTAAAG                             | amplification of KanR gene                              |
| Kana-R      | CGCGGATCCTCAGAAGAAGT<br>CGTCAAGAAGGC                              | amplification of KanR gene                              |
| kana200-F   | GCCCTCTGGTAAGGTTGG                                                | determination of KanR gene                              |
| kana200-R   | GCCGATTGTCTGTTGTGCC                                               | determination of KanR gene                              |
| phageup-F   | GCCTTGAAGTCAAATGCCCG                                              | amplification of upstream homologous arm                |
| phageup-R   | ATGATTTTCGTAGGGCCCTCAT<br>CGCCATTGCTCCCAA                         | amplification of upstream homologous arm                |
| spCas9-F    | ATGGCGATGAGGGCCCTACG<br>AAATCATCCTGTGGA                           | amplification of CRISPR/Cas9 cassette                   |
| spCas9-R    | AACCATTACGAACTGTGAAC<br>ACACTACTCTTCTTTTGC                        | amplification of CRISPR/Cas9 cassette                   |
| phagedown-F | AGAGTAGTGTGTTACAGTT<br>CGTAATGGTT                                 | amplification of downstream homologous arm              |
| phagedown-R | TTTCCTCGCGGTCCATGC                                                | amplification of downstream homologous arm              |
| phicas-F    | CTGCGTTACCGAGTGGAT                                                | confirm the recombination                               |

|            |                         |                                                                     |
|------------|-------------------------|---------------------------------------------------------------------|
|            |                         | of CRISPR/Cas9 within the temperate phage                           |
| phicas-R   | AAGGCTAGTCCGTTATCAA     | confirm the recombination of CRISPR/Cas9 within the temperate phage |
| Cas350-F   | GCCGTCGTTGGAAGCTGCTTT   | GCCGTCGTTGGAAGCTGCTTT                                               |
| Cas350-R   | TCCTTGGAGAATCCGCCTGT    | TCCTTGGAGAATCCGCCTGT                                                |
| Phage200-F | ggaccagcatac gatctgccgt | detection of the temperate phage                                    |
| Phage200-R | caggcaaagtcctggctgat    | detection of the temperate phage                                    |

**Table S2. Comparison of techniques for construction of phage-delivered CRISPR/Cas9 system**

| Study                                 | This study                                                   | Previous study(13)               | Previous study(12)               | Previous study(15)                        |
|---------------------------------------|--------------------------------------------------------------|----------------------------------|----------------------------------|-------------------------------------------|
| Phage name                            | vB_EcoM_IME365                                               | M13                              | ΦNM1                             | λ                                         |
| Method for integration of CRISPR/Cas9 | Homologous recombination                                     | Phagemid construction            | Phagemid construction            | Homologous recombination                  |
| Method for Recombinant screening      | Suicide gene based counter-selection, avoid resistant marker | Resistant marker based selection | Resistant marker based selection | Resistant marker based selection          |
| Resistance residue                    | none                                                         | Remained in phage particle       | Remained in phage particle       | Deleted by another Flippase recombination |

**Text S1. Whole genome sequence of vB\_365**

>Seq1 [organism=Escherichia virus Lambda-like phage vB\_EcoM\_IME365],  
chromosomeTAAGCATCAGTGAAACCTCGCCGCTTGCTCTGCTGGTTCAATG  
GAAATAACCAGGTCTTTGTCGCCTAACTGCCAGATAATTCCCTGTTCTTCTT  
CGTCCCCTGTCATTGCCTCCACATAAGCCATAAGGTAATTCATCATGATGTTT  
ATGCCGTCGACTCCTTCGCTTTCTGCATCTTCCATGAGGTCAGAGAAACGC  
TCGATGTAGTCTTCTTCTGCGCTCATAGCTATTTCCCTCAGGTTGAACATTTCG  
AAGGTAATGCGTCGTCATCGGCAAACATGTCTATTTGCAGAGCTCGCTCAG  
CAACTGCTTGCTTAGCAATACTCCAGAATTTTCCAGATGGGACGTGTTTATT  
TGGCTGAATTCCAAGTCTTTCCATTTTCGGCAAATAACCCCTCCCTTTCCCTCC  
AAATAAACTGCGCCAGCTTCATCCTTGTGAATTGCATATCCGATTTCTCTCTT  
CCGCAGCTTTTCGCCTCATTCCAGATGTCTTTACGAAGCACATAAACGCAGT  
ACCAGTGTTGCCATCCTGCCTTTAAACAGCCAATGCAATTTGCGTGCTTAAA  
TCTCGAATAAGCCATTGGGCGGTTAATGCCAATTTCTTCCGTAGAGTGGATT  
GTTCTTTGCGGCCATAGGGCAATCGGATAGTCAGTTTTATAACCTCGTTCAG  
CCATAACACCCACGCGGCGCTGAACTCGATGCATTTTCAATTTCTGTCAAATCC  
GTAGTAGTAGATATTTTCCCTTTTGGCTATCATTACGCTCCAGCCACAGATCAA  
ACGGTCTGTCTTAAGCCTGTTGGTGCATAGAATTTGACCTGATCCAACCTT  
CCATGCCCTCGCGTCAAGGCAAACAGATATTGGAGTAGCGTCTTTCCACCT  
TTCATGGTTGGCATAACGTAACATCTATCCCTAAATAACTTGATATCTCATCCTT  
AAATCTCTTGATGTCCTCGTCTTCTACTGTGCTACTGATGTCGTGGTTAAGC  
AGGATGACATTTTCTCTTCCATATTTTCTGACCACCTCTATCGCGACAATTGC  
CGAGGAGTGGCCTCCGCTATACAAAACACTACGTGCTTCATGCCCATACCCTCT  
GTTGATACTTACTCCTACCCTTTGGCTCGCTGGCGTATTCTGGAAGCAACGC  
GGAAACCACCCATAACCGAGGGTCTGCGCTTAGCGTTCGTTGAGTTTTTAC  
GTTGCGGGATTGGTAGGCGGTGATTAACCTGAGTTGCTTCTTCGTTGGTGAG  
GTCGTGATGGTCAAACCATGTGAGCTTCAATCGTACCTCCTGTCAGTGAAC  
CTGACGCTCTGACCGATAGCCCAGGCAGTCGTATACTCTATGAGGCTCGCC  
ATGCGCCCCACGCTCATCTGCGCGCTGCTTTCGCGAATGTTGACGTATTCGC  
CTTCAAGCCCGGGCAAACATCAGCTTCCCTGCTTTGTTGCCACTGCATGAC  
CGCTGATCAACAAAACCTTCCATTGTTCTGGTTTTAAACCATTTATCGCGCCA  
CTGAACTTGCCTGGCGATATCTGCGACCATAGCGTGAAATTTTTCGTTCTGG  
TCAAGGTTGCGCTTGTAGTCAGTAATGCGGATGGTAACTGGCTTGTCTTTAT  
CGAGTGGTGTGCGAGGATGGCGTTGATTGCGGCTTGTGTTGTTGCTTAG  
TTCGGAGGAAGATTGTTTGTCTTTCATCGTTACCTCAACTCACAAAACGCCAC  
GCCACTTTTGTACGACAACAGGCATAACACCGATAATCACCCACAGGAAA  
ATGCTACCGAAAAGCACACCAACCAAGTCTTTACCTTCGCCTACCAGCCGG  
ACAAAACCTGCTGGCAACCACAATGAACGTCGCCACCATCCACATAGCACC  
GAGAATCCTCAATGCAGAAAAAATCAACTCAACCACGATTTACTCTCCCC  
AAATAAAAAGGCCTGCGATTACCAGCAGGCCTGTTATTAGCTCAGTGATGT  
AGATGGTCATCTTTTAACTCCATATAACCGCCAATAACCCGTTTCATCGCGGCA  
CTCTGGCGACACTCCTTAAAATTAGGTTTCGTGCTCATCTTTCCCTTCCCGTT  
CTTCCCTTGGTAGCAAACCGGTAATACACCGTTCGCCAGACCTTACCTTCGAT  
AGCCAGAAGACCTGCCCGTGCCATTTTAGCCGCAGCCTGATTTATGCTGGTT

ACCGTTGCGCCTGTTACCGCGGCAACGTCCTGCGCACAGAATTTCTTATGA  
GTCCCCAGGTAATGAATAATTGCCTCTTTGCCCGTCATACCCTTGCTCCTTTC  
AGCCCAAAGTTAGCTTTGATTTCTGCGATCTTCGCCAGAGCCTGTGCACGA  
TTTAGAGGTCTACCGCCCATGACAGGAAGTTGTTTTACTGGTTCAGGTATAG  
CCTCACCACGGTTAATTCGTGCGGTCATACAGGACAGTTCATCGGCAGCCT  
TGCGCCGTAATTCCGCGTCAGTCAACGCATTGGCCCGCATGTTCTGATACA  
GGTTGGTAACCAGCCAGTAGTGCGCGTTTGATTTCCACGGATAAGACTCTG  
CATCCGGATACAGCCCGCGCTTCCGGCAATACTCGTAAACCATATCAACCA  
GCTCGCTGGCGTTTGGCAGCCCGGCGGTAACGGATGCTTCTTCCCGGCACC  
AGGCGACAACTGCCCGGGTGATGGCAGGAATGGTCGATTCTGCCGACGG  
GCTACGCGCATTCCAGCGTTAACCTGTTCCATTGTGGTGATCCCGTTTTCC  
GAAAAGCCAGCACCCACTGGCGGCGGATTTCTGTTAGTTCATTCTGGTCAC  
GGTTAGCCAGGCTCGCCGGGAAAGTTGCCAGTAACTGGCTGAACACACCG  
TTGATGATCTGCGCTACCTGCTGTACCTGCGGCTTTTCGTCGTACTGTTCCG  
GCATGTTGTTGGCGATCCGACGCATCTGCTCACGGTCAAAGTTAACCATCT  
GTGCGGCGATGTTTTTCATAAATCCACCCCGTAAATCCAGTCAGTGTTTGT  
AGGTGAGTTTTGGTTTGTGGCTATCATGCCTGCCTGTTGCTTGTACGGT  
TGATTTGAGTTGGGTCCACTTATCGCGGAGTTTGGCCGGGCTCAGCACGT  
TACCGGACCAGAAGTTGTCTGGCATGCCAGCGGAACAGCACGCACATG  
TCGCGGTGGTTACGTCCGTCACGTTACGCATCAGGCGGATATCGTTAGCC  
CACCCAGCAAATTCGGTTTTCTGGCTGATGGTGCGATAGTCTTCACCATGT  
CAAACATCCACTCTGCGGCGGTCAGGTCTTCTGCTGTCCCCACTTGCTGC  
CGCTCTGAATTGCAGCATCCGGTTTCACCACAGAAAGGTCGTTTTCTGGCT  
GGTCAGAGGATTCGCCAGAATTCTCTGACGAATAATCTTTCTTTTTTCTTT  
TGTAATAGTGCTTTTTGTGTCCCCCTGTTTTGAGGGATAGCAATCCCCAAT  
TTGAGGGATGTTTTATCCCTCGTTTTAGGGGATTTCCCTCGTTTTGAGGGA  
TGCACCATTCTGAGATGTTTTATTTGGTCCAAACATGCCGCCTTGCTGCTT  
GATAATATTCATTCTGACGAGTTCTAACTTGGCTTCATTGCACCGTTTGACG  
GGTAACTTTGTAATCTCGCTAAGTTGAGAATCGGTGATTCTGTCCATTGGTT  
TATCCACCCATAGGTTTTACGCAGAATGGCAAGCAGCACTTTAACTGTC  
GCTTGGTCAGATCTGCGCCCGAATAAGCCTCAAGCAGCATATTTGATAGTCT  
GGCGTAACCATCATCGAGATCTGCCACATTACGCTCCTGTCCGGCAAAGTT  
ACCTCTGCCGAAGTTGAGTATTTTTGCTGTATTTGTCATAATGACTCCTGTTG  
ATAGATCCAGTAATGACCTCAGAACTCCATCTGGATTTGTTTCAGAACGCTCG  
GTTGCCGCGGGCGTTTTTATTGGTGAGAATCGCAGCAACTTGTGCGGCCA  
ATCGAGCCATGTCGTGTCACGACCCCCATTCAAGAACAGCAAGCAGC  
ATTGAGAACTTTGGAATCCAGTCCCTCTTCCACCTGCTGATCTGCGACTTAT  
CAACGCCACAGCTTCCGCTGTCTTCTCAGTTCCAAGCATTGCGATTTTGT  
AAGCAACGCACTCTCGATTCTGATAGAGCCTCGTTGCGTTTGTGTTGCACGAAC  
CATATGTAAGTATTTCCCTTAGATAACAATTGATTGAATGTATGCAAATAAATG  
CATACACCATAGGTGTGGTTTAAATTTGATGCCCTTTTTTCAGGGCTGGGATGT  
GTAAGAGCGGGAATGTCTTAAGCGGCTTTACCGCGTTTAGTTCCGTAAGTGT  
AACCAAACCGGATCACAGTTAAGCGCCATAGCAATCTCAAACAAGAAGCG  
CGGTGCTTGGTTACTCCAGCTTCAATCAGTTGAATTGATTGCTGTTTAAACA



CCGGCTTTGGTTGCCAGTTCGGTTTGCATATCGCCTCCATCAACAACTTTC  
TCTTGAGGCGTTCAGAAAGAGTTTGCATATCGCCTCCATCAACAACTTTC  
TTGTATTTTCATACAATGTATCTTGTGTTGTCAAATACAGTTTTTCTTGTGAAG  
ATTGGGGGGGTAATAACAGAGGTGGCTTATGAGTATTTCTTCCAGGGTAA  
AAAGCAAAGAATTCAGCTTGGACTTAACCAAGCTGAACTTGCTCAAAAG  
GTGGGGACTACCCAGCAGTCTATAGAGCAGCTCGAAAACGGTAAAATAA  
GCGACCACGCTTTTTTACCAGAACTTGCATCAGCTCTTGGCGTAAGTGTGA  
CTGGCTGCTCAATGGCACCTCTGATTCGAATGTTAGATTTGTTGGGCACGTT  
GAGCCCAAAGGGAAATATCCATTGATTAGCATGGTTAGAGCTGGTTCGTGG  
TGTGAAGCTTGTGAACCCTACGATATCAAGGACATTGATGAATGGTATGAC  
AGTGACGTTAACTTATTAGGCGATGGATTCTGGCTGAAGGTTGAAGGTGAT  
TCCATGACCTCACCTGTAGGTCAAAGCATCCCTGAAGGTCATATGGTGTAG  
TAGATACTGGACGCGAGCCAGTGAATGGAAGCCTTGTGTAGCCAACTGA  
CTGACGCGAACGAAGCAACATTCAAGAACTGGTTATAGATGGCGGGCAG  
AAGTACCTGAAAGGCCTGAATCCTTCATGGCCTATGACTCCTATCAACGGG  
AACTGCAAGATTATCGGTGTTGTCGTGGAAGCGAGGGTAAAATTTCGTATGA  
TCAGGATTGCGGCGCTACTCTCAATACTCTTAACTACCAGCGCCAATTCTGA  
ATGCTGGATTGTCACAAACCTGCACGGGTACGGGGCAATGAATGGCGATCG  
TTACGAGTTTACAAAAGACAGCACGGAAGATTCCGTTTTCCACGTAACAAT  
AAATGGCGATAAATCATCAGTTTATGAATCAGTTTCTGGCGTCTATCCAGAG  
ATGAAATACACTGCTTTGTCATCGAACACTATGGTAGGAGAATACCAGTCTG  
GAGGAGGAATAACCGTTGAAACCTGGTCAATCACTACAAACAAAAAAGCT  
CTTACTCCAAAGTAATGAACATCCAGGTATGCAACAACCTTACATCAACC  
AAATCCTTTGTTGGTGATGTAGTCGGAACCTGCAACCAGTAATCCCCACCT  
CAATCTCGATAACCAAAAAACAACTATTTTCCGTTTAAAAACAATGAAGT  
TTGTTTTTTCATGCCCTTTTTTACAATGTTTCTTGTGTTACAACATACAATCTT  
CTTGTAATTTTAAAGCCATCAGCAGGACGCACTGACCACCATTGAAGGTGAT  
GCTCTTAAAAATTAAGCCCTGAAGAAGGGCAGCATTCAAAGCAGAAGGCT  
TTGGGGTGTGTGATACGAAACGAAGCATTGGCCGGAAGTGCGAATCCGGA  
TTAGCTGCAAATGAGCCAATCGTGGGGTGTGTTTCGTTTCAGGACTACGACTC  
ACACACACCACCAAAGCTAACTGACAAGAGAATCCAGATGGATGCACAAA  
CACGCCGCCGCGAACGTGCGCGCAGAGAAACAGGCTCAATGGAAAGCAGC  
AAATCCCCTGTTGGTTGGGGTAAGCGCAAACCAGTTAACCGCCCTATTCT  
CTCGCTGAATCGCAAACCGAAATCACGAGTAGAAAGCGCACTGAATCCGAT  
AGACCTTACGGTGCTGGCTGAATACCACGAACAGATTGAAAGCAACCTGC  
AACGTATTGAGCGCAAGAATCAGCGCACATGGTACAGCAAGCCTGGCGAA  
CGCGGCATAACATGCAGAGGACGCCAGAAAATTAAGGTAAATCTATATCA  
CTTATTTAGAAAATGCAGATTTAGGGAACAGATAGGAGGCGTTACACCTATG  
GCATCTCATCCTATGGTTAGAAGGTGGTGCAAATCCTTCGTATTGAAGTATG  
GATTTACAGAAGATTCATAGCATTGAGCGCAAAGATAGTGCATTGGCTGA  
CCGGTATTTGCCGATTTTTTGGAGACGATAAACTACCGTAGCAACAGTAGGTG  
TATACATCTCATAGTTTTTCTTTTCTTCCCCTTAGAAGCTCGATTTATCT  
TTTCTTCAAGCTCAATAATCTTATCCTTAGAAATCATCAAAAGCTCATTAAGT  
GACATTTGCTGCTGTTGGGCATCCATGAGCTTATCGACAAGTTCGTATGTT

TTTCTTTTACTGAGTAGTCTATTTGCATTTTCTGGATTTTCCTTTACTGCGCCA  
ACAGCACTCATCAGAGCACCTCCGGCACCAGAACTGCATCTGTAATCCTA  
CTTATTATTCCTTTTTTCATCAGACATATAAATCACTCTTACTGTAGGGGTA  
AGAGGATTTTACTATTTTTCTCGCTGTAGGGGTACACGAGAACCACCGAGC  
CTGATGTGGTTAAAAGACAGGCATACTAATAAACACTGCACTGTGTATTTAT  
TCCAACGAGTGAATACACGGAGCAATGTCGCTCGTAACTAAACAGGAGCC  
GACTTGTCTGATTATTGGAAATCTTCTTTGCCCTCCAGTGTGAGGGCGATT  
TTTTATCTATGAGGATATGAATAGATGTCAAACATCAAAAAATACATCATTGA  
TTACGACTGGAAAGCATCAATAGAAATTGAAATCGATCATGACGTAATGAC  
AGAGGAAAACTTCACCAGATTAATAATTTCTGGTCAGACTCTGAATACCG  
ACTCAATAAACACGGCTCTGTATTAATGCTGTATTAATCATGCTGGCGCAA  
CATGCTCTGCTTATAGCAATTTCAAGCGACTTAAATGCATATGGTGTGTGT  
GTGAGTTCGACTGGAATGATGGAAATGGTCAGGAAGGATGGCCTCCAATG  
GATGGTAGCGAAGGAATAAGAATTACCGATATCGATACATCAGGAATATTTG  
ATCCAGATGATATGACTATCAAAGCCGCCTGAGCGCGGGCGTTACCGCATAACC  
AATAACGCTTCACTCGAGGGCGTTTTTTTCGTTATGTATAAATAAGGAGCACAC  
CATGCAATATGCCATTGCAGGGTGGCCTGTTGCTGGCTGCCCTTCCGAATCT  
TACTTGAACGAATCACCCGTAAATTACGTGACGGATGGAAACGCCTTATC  
GACATACTAATCAGCCAGGAGTCCCAAAAAATGGATCAAACACTTATGGC  
TATCCAGACTAAATCACTATCGCCACTTTTATTGGCGATGAAAAGATGTTT  
CGTGAGGGCCGTCGACGCTTATAAAAAATGGATATTAATACTGAAACTGAGAT  
CAAGCAAAAGCATTCACTACCCCCCTTCCCTGTTTTCTAATCAGCCCGGCA  
TTTCGCGGACGATATTTTCACAGCTATTTACAGGAGTTCAGCCATGAACGCTT  
ATTACATTCAGGATCGTCTTGAGGCTCAGAGCTGGGCGCGTCACTACCAGC  
AGCTCGCCCGTGAAGAGAAAGAGGCAGA ACTGGCAGACGACATGGAAAA  
AAGCCTGCCCCAGCACCTGTTTGAATCGCTATGCATCGATCATTTGCAACGC  
CACGGGGCCAGCAAAAAAGCCATTACCCGTGCGTTTGATGACGATGTTGA  
GTTTCAGGAGCGCATGGCAGAACACATCCGGTACATGGTTGAAACCATTGC  
TCACCACCAGGTTGATATTGATTCAGAGGTATAAACGGATGAGTACAGCA  
CTCGCAACGCTGGCTGGGAAGCTGGCTGAACGTGTCGGCATGGATTCTGTC  
GACCCACAGGA ACTGATCACC ACTCTTCGCCAGACGGCATT TAAAGGTGAT  
GCCAGCGATGCGCAGTTCATCGCATTGTTGATCGTCGCCAACCAGTACGGC  
CTAATCCGTGGACGAAAGAAATTTACGCCTTCCCTGACAAGCAGAACGGC  
ATCGTTCCGGTGGTGGGCGTTGATGGCTGGTCCCGTATCATCAATGAAAAC  
CAGCAGTTTGATGGCATGGACTTTGAGCAGGACAATGAATCATGTACATGC  
CGGATTTACCGCAAGGACCGTAATCATCCGATCTGCGTTACCGAGTGGATG  
GATGAATGCCGCCGCGAACCATTCAAACCCGCGAAGGCAGAGAAATCAC  
GGGGCCGTGGCAGTCGCATCCCAAACGGATGTTACGGCATAAAGCCATGAT  
TCAGTGTGCCCGTCTCGCCTTCGGATTTGCTGGTATCTATGACAAGGATGAA  
GCCGAGCGCATTGTCGAAAATACCGCATACTGCAGAACGTCAGCCGGA  
ACGCGACATCACTCCGGTTAACGATGAAACCATGCAGGAGATTAACACTCT  
GCTGATCGCCCTGGATAAACATGGGATGACGACTTATTGCCGCTCTGTTCC  
CAGATATTTCCGCCGCGACATTCGCGCATCGTCAGAACTGACACAGGCCGAA  
GCAGTGAAAGCTCTTGGATTCCTGAAACAGAAAGCCACTGAGCAGAAGGT

GGCAGCATGACACCGGACATTATCCTGCAGCGTACCGGGATCGACGTGAGA  
GCTGTCGAACAGGGGGATGATGCATGGCACAATTACGGCTCGGCGTCATC  
ACCGCTTCAGAAGTTCACAACGTGATAGCAAAGCCCCGCTCAGGAAAGAA  
GTGGCCTGACATGAAAATGTCTACTTCCACACCCTGCTGGCTGAGGTTTG  
CACCGGTGTGGCTCCGGAAGTTAATGCTAAGGCGCTGGCCTGGGGAAAAC  
AGTACGAGAACGACGCCAGAACCCTGTTTGAATCACTTCCGGCGTGAATA  
TACTGAATCCCCGATCATCTATCGCGACGAAAATATGCGCACCGCCTGCTC  
TCCCGATGGTTTATGCAGTGACGGCAACGGCCTTGAAC TGAATGCCCGTT  
TACCTCCCGGATTTTCATGAAATTCCGGCTCGGTGGTTTCGAGGCAATAAA  
ATCGGCTTACATGGCCCAGGTGCAGTACAGCATGTGGGTGACGCGAAAAG  
ATGCCTGGTACTTTGCCAACTATGACCCGCGCATGAAGCGTGAAGGCCTGC  
ATTATGTCGTGATTGAGCGGAATGAAAAGTACATGGCGAGTTTTGACGAGA  
TGGTGCCGGAGTTCATCGAAAAAATGGACGAGGCACTGGCTGAAATTGGT  
TTTGTATTTGGGGAGCAATGGCGATGACGCATCCTCACGATAATATCCGGGT  
AGGCGCGATCACTTTCGTCTACTCCGTTACAAAGCGAGGCTGGGTATTTCC  
CGGCCTTTCTGTTATCCAAAATCCACTGAAAGCCCAGCGGCTGGCTGAGGA  
GATAAATAATAAACGAGGGGGCTGTATGCACAAAGCATCTCCCGTTGAGTTA  
AGAACGAGTATCGAGATGGCACATAGCCTCGCTCAAATTGGAGTCAGGTTT  
GTGCCAATACCAGTAGAAACAGACGAAGAATTCATACGTTAGCCGCATCC  
CTTTCACAAAAGCTGGAAATGATGGTGGCGAAAGCAGAAGCAGATGAGAG  
AGACCAGGTATGACAACCACGGAATGCATTTTTCTGGCAGCGGGCTTCATA  
TTCTGTGTGCTTATGCTTGCCGACATGGGACTTGTTCAATGACACCTCAGCA  
GGAAAACGCCCTTCGCAGCATTGCCCGTCAGGCTAATTCTGAAATCAAAAA  
AGCCAGACAGCAGTTTTCCGGATAAAAACGTCGATGACATTTGCCGTAGCGT  
ACTGAAGAAGCACCCGCGAAACGGTAACGCTGATGGGATTCACACCGACTC  
ATTTAAGCCTGGCAATCGGCATGTTAAACGGCGTCTTTAAGGAACGATGAA  
CATGAAAAGCAAATCATCAGGGAGCTACAGGCTCCTTTTTTTTATTATTCGC  
ATTCACCCTCAAGCGTATTAACCAACAATTCAGGGATTAATGGAAGATGGC  
AGACATCATTGATTCAGCATCAGAAATTGAAGAATTACAGCGCAACACAGC  
AATAAAAATGCGCCCGCTGAACCACCAGGCTATATCTGCCACTCATTGTTGT  
GAGTGTGGCGATCCGATAGATGAACGAAGACGCCTGGTTCGTTACAGGGTTGT  
CGGACTTGTGCAAGTTGCCAGGAGGATCTGGAGCTTATCAGTAAACAGAG  
AGGTTCGAAGTGAGCGAAATTAAGTAAAGCCAAAGATAAAATCATCGCTG  
AGCAGGAGAAAATCGCTAACGGAGAAAAGACAGTAAGTCAGTATATGAAA  
ACCGCATGATATCATCAGATAAAAATCGGTTCGTAAAGCGAAATATTAATACC  
AGAACAAACGAGTCGAGGTAAATTATATTACCTCGATAAATTAATAAACT  
TGCCCGCTATATACTATATCATTAGTATCATCACGCGCGGTCTGTGCATATG  
TCACTACCGCACCTAATATATTAATTTTCTTTTCAACATAGATAATATTATCGT  
ACTCATAATTGCCATACGGATAGCAAATGCGAATATTCTCATGTAGATCGGG  
GTCATCCACCTCAGCTCCAGAACAAC TTTTGAAC TACC GGAAGTATACCG  
ATACGGTGCAACATAAGACGATGTCTCTCCAGGCAAAAAATAAGTTAGTGT  
CGTAAGGAGTATAATCAGAAAAAATCCAGCAAATATGCACATCCCTGCATA  
AACCTTAAGGTATGCTGACAGACTCTTCCAGCCTCTTTGTTTTACTATCCCC  
TTCTTAACCCAAAACAGAGATAACAGAAAAGCTATTCCCATGCTAAACAGA

ATGTAATAGTGGGATATACTCTGATTAAGAAACGTGACCCTGTAGATATCTG  
CCCGCCACCAGAAGAAAAGGAAAATAAAGATCAGCCCTGAAACTGTCATG  
CAAATCAAATAAGGATACGAATCTTTTTTCATGTTTAGCGCCATAAAATTTT  
TCCTGACCCGGACAAATTTACCATCCATTTTTTGGCGCAGAAAATAGCTCATT  
ACTTACTGCACAATAATACACAAAATTGCGTAAATTTTTTGCATGGATTTTA  
GCTCTTTCAGCCGACATTTAAGGGGTAAAGAGCATTTCCTAAAAGCAACTG  
ACCAACCCAACAGAATGGGCTACCGCTTACGTTGAGAGCAAAAAAGTGTA  
TAGCAGCAATGAACAGCATCCTCGCACTGACGAGGATTTCTTTTATCTGAA  
CTCGCTACGGCGGGTTTTGTTTTATGGAGACAAGAAATGTCAGATTTGGCTA  
TGAAGGTTTTGAAATGGCAATCAACTGGCGATGTCGGCATCAGTAGCGCAA  
CTCTTGCCTCAATCGCATGTGGCCTGAAAAAGAATATCTATGGTCATCACTT  
CGGCGCTCCCCATGACGCAGCAGACTTTCGGCGATGCGTTGCACTTGTTGA  
GCAGATTCCAGAAATCAGAGATTCATTCGACAAGGTTGCAAAGCGCGTTCC  
GGCATTCAAAGGAATCCTCAACGAATGGGATTCATCTGTTGCTCTGTTGAA  
GTCTGAAATGAAGACGTACGGGAACAAAGCACCAGAGACTTACAGAAGAA  
TCAGCGAGCTACGCAAGGACTAACCCGCCTCACACTCGATGAGGCCTGTTT  
ATTTCTCAAGATATCCAGACCTACCATTGCTGCATCAATGCGGCTTTTTATTG  
CCTGATTTGCAGGTTTCGATTCCATATTCGGAGATAGCACTCATGCAACACGA  
ACTACAACCTGATTCATCTGGTTGATTTGAAATTCATCATGGCTGATACTGGC  
TTCGGTAAGACCTTCATCTATGACCGGATTAAGTCCGGCGACCTGCCTAAA  
GCCAAAGTTATCCACGGACGAGCAAGATGGTTATATCGTGACCATTGTGAA  
TTCAAAAATAAGCTCTTAAGCCGCGCCAATGGGTAAAATAGCGGGTAAAAT  
ATTTTTACATCTAAAAAACACCATTCCAATCAATCCCCTGCCGCCTCAAGT  
AGATGTCTGCAGGGGACACCATTTATCAGTTCGCTCCCATCCGTACCAGTCC  
GCAAAATCCCCTGAATATCAAGCCTTCCGTAGATTCACAGTTCGTAATGGTT  
CGCGTCAGATCGTTGACAGCCGCACTCCATGACGGGTAAAAAGTGGATAA  
AATAATTTTACCCACCGGATTTTTTACCCATGCTCACCGTTAAGCAGATTGAA  
GCAGCAAAGCCGAAAGAAAAACCATACCGCCTACTCGATGGTAATGGCCT  
GTACCTTTATGTCCCTGTGTCAGGGAAAAAGGTATGGCAGCTTCGCTACAA  
GATTGACGGTAAGGAGAAAATCCTGACCGTAGGAAAATATCCGCTAATGAC  
TTTGCAGGAGGCAAGAGATAAAGCATGGACCGCGAGGAAAGACATCTCGG  
TTGGCATCGATCCGGTAAAAGCGAAAAAGGCTTCGTCTAACAACAATTCCT  
TTAGTGCGATTTACAAGGAATGGTACGAGCACAAGAAGCAAGTCTGGTCA  
GTAGGCTATGCAACTGAACTTGCAAAAATGTTTGATGACGACATTTTACCTA  
TCATCGGCGGCCTTGAAATTCAGGATATTGAGCCGATGCAACTGCTGGAAG  
TAATCCGCAGATTTGAAGATCGCGGTGCAATGGAGCGAGCCAACAAAGCC  
CGCAGAAGATGCGGCGAGGTTTTCCGTTACGCTATTGTCACTGGTAGGGCT  
AAATATAACCCGGCACCTGACCTTGCTGACGCCATGAAGGGATACCGCAAG  
AAGA ACTTCCCGTTTTCTCCAGCAGACCAGATCCCTGCATTCAACAAAGCA  
CTGGCAACATTTTCAGGAAGCATCATATCGCTCATTGCGACCAAAGTTTTAC  
GCTACACAGCCCTAAGAACGAAAGAGCTTCGCTCCATGCAATGGAAGAAC  
GTCGATTTTGAAAACAGGATTATCACTATCGACGCCAGTGTGATGAAGGGC  
CGCAAGATTCATGTTGTTCCATATGTCAGACCAGGTGGTTGAACTTCTACTA  
CGCTAAGCTCCATCACTAAACCAGTATCAGAGTTTGTTTTTGCCGGGCGCA

ACGATAAGAAGAAGCCAATCTGCGAGAACGCGGTGCTACTTGTGATCAAA  
CAAATCGGCTATGAGGGTCTGGAAAGCGGTCACGGATTCAGGCATGAATTC  
AGCACGATTATGAACGAGCACGAATGGCCTGCTGATGCTATTGAAGTGCAA  
CTGGCACATGCCAACGGCGGATCTGTGCGCGGGATTTACAACCATGCTCAG  
TATCTCGATAAGCGCAGAGAAATGATGCAATGGTGGGCGGACTGGCTTGAT  
GGGAAGGTGGAGTAATCCGCCTTAACCACTATCGAAGAGCACAAAGCCTT  
GCAATCCAGTACAAAGCTATGTGTGTCTCAGTTTTGTCCCTCTTTTTTGTAC  
TAAAAACATAGCAATTGAGGATAAACCTCATGCTATTTTCGCTTATATGCCT  
TTAAAGGCATGGCGCTTAAATAGATAAAAAACACCACAAAAGCATAAAAAAC  
CACACAGTAAAACCGCAACATAAAACAATAACAGATAATTAACCAAAAA  
CAGATAGCGCATTGTGATAATCATTCAATACTAAACAAAATATAAACAGTGG  
AGCAATATGTGATTGACTCATTAAAGTTAGATATAAAAAATACATATTCAATCA  
TTAAACGATTGAATGGAGAACTTTTATGCGGGCGAACTTCTGGGAATAG  
TTCTGACAACCCCTATTGCGATCAGCTCTTTTGCTTCTACCGAGACTATATC  
GTTTACTCCTGACAACATAAATGCGGACATTAGTCTTGGA ACTCTGAGCGG  
AAAAACAAAAGAGCGCGTTTATCTAGCTGAAGAAGGAGGCCGAAAAGTC  
AGTCAACTCGACTGGAAATTCAATAACGCTGCAATTATTAAGGTGCAATT  
AATTGGGATTTGATGCCCCAGATATCTATTGGGGCTGCGGGCTGGACTACTC  
TCGGCAGCCGAGGTGGCAATATGGTCGATCAGGACTGGATGGATTCCAGTA  
ACCCCGAACCTGGACAGATGAAAGTAGGCACCCTGATACACA ACTCAATT  
ATGCCAACGAATTTGATCTGAATATCAAAGGCTGGCTCCTCAACGAACCCA  
ATTACCGCCTGGGACTCATGGCCGGATATCAGGAAAGCCGTTATAGCTTTAC  
AGCCAGAGGTGGTTCCTATATCTACAGTTCTGAGGAGGGATTTCAGAGATGA  
TATCGGCTCCTTCCCGAATGGAGAAAGAGCAATCGGCTACAAACAACGTTT  
TAAAATGCCCTACATTGGCTTGACTGGAAGTTATCGTTATGAAGATTTTGAG  
CTAGGTGGCACATTTAAATACAGCGGCTGGGTGGAAGCATCTGATAACGAT  
GAGCACTATGACCCAGGAAAAAGAATCACTTATCGCAGTAAAGTCAAAGA  
CCAAAATTACTATTCTGTTGCAGTCAATGCAGGTTATTACGTAACACCTAAC  
GCAAAGGTTTATGTTGAAGGCGCATGGAATCGGGTTACGAATAAAAAAGGT  
AATACTTCACTTTATGATCACAATGATAACACTTCAGACTACAGCAAAAATG  
GTGCAGGCATAGAAA ACTATACTTCATCACTACTGCTGGTCTTAAGTACAC  
CTTTTAACGAAGTTAACCAGATTTTCTCCCCGGTGGTATTGTATAACCCCGG  
GGAATTTGTTTACAGTTACAAGTAGGCAATATCCACTAATTTTGTAAGCATTT  
AACCTATGTCATAACGTGTAATCTCTTACCGCAACACAAGACCTCAATATAT  
TCAAATCTTATCTTTATTCGATATTCAGAGACACAATGCGAAAAATAATTAC  
TCATTTCAAAGTTGTTTTAACGTTACTTCTACCAGTAACCGTATCTGCCAG  
CAGATACAGTGGCAATCCTGTATGGCCAGTCAATTCAACCACTGGTTTGGT  
GAGGAAAAACCGTCTCCTGACTTACTATGTGGTTATTTGTCTGTTCCATTAA  
AATATACAGACACAGGCGGAGATGCTTCTTATGAAAAAAAATCACAAGTCA  
AACTAGCGTTGACAAAATTGCCGGCAAAAAGCAAGCATAAAGGAAGTATC  
CTGATAATAAGTGGTGGTCCCGGGTTACCAGGCATAAATCCTTATATTA ACTT  
TGACTGGCCAGTCACAAATCTTCGTGAGTCATGGGATATTATTGGATTTGAT  
CCTCGAGGCGTCGGACAGTCCACTCCGACAATAAACTGCCGGCAATCAGAT  
ACAGAGACTCAGGAAAACATAACCGAAAAGCAACAAGTATTAATAAAAT

TAATGCCTGTATCCATAATACCGGAGCCGAAGTCATTCGCCATATCGGCTCT  
AACGAGGCTGTATACGATATTGATCGTATTAGGCAAGCCTTGGGGGATAAAC  
AACTGACAGCCGTGGCGTATTCGTATGGAAGCTCAAATTGCAGCCTTATATGC  
AGAACGTTTTCCCTACAACGTAAGATCTATCGTTCTTGATGGAGTCGTCGAT  
ATCGATGACCTGGAGGACAACCTTCACATGGCAACTCAAACAGGCACAGAG  
TTATCAGGAAACGTTTGATCGCTTTGCATCCTGGTGTGCGCGTACAAAAAG  
TTGCCCGCTTTCTTCAGACAGAGATAAGGCAATAACTCAGTTCATGAGCTA  
TTATCAAATTACATCACAAACCTTTATTAGACAGTAAGGGAGAAAATATAT  
CTTCAGATGAACTCATATCATTAACAACAGACCTTCTGCTATGGCGTTCATC  
ATGGCCAACCCTTGCAACTGCCATACGCCAGTTCTCTCAGGGGATTGTCAG  
TAATGAAATTGAAACTGCGCTCAGTGCTCCGATAGCCTCAGAAGAGTCAAG  
CGATGCTTCGGGGGTAATCCTCTGTGTAGATCAGGGGGATGAGCAATTAAC  
ACCAGAAGAGCGAAAATCCCGAAAAGACGCTCTTGCGAATGCCTTCCCGG  
CTATTAACCTTTGACAATGGACGTTCCGATTACCTGATTTTTGTGAATTATGG  
CCAATACATAGCGACCTGAACAAAACCTCGCCTGAAAAATACTGTTCTGCC  
TCTGGTTTACTGTTTGTAGCACACAAATACGACCCAACAACGCCCTGGATT  
AATGCCCGTAAGATGGCAGAGAAATTTTCCAGCCCGTTACTAACAATAAAT  
GGTGATGGGCATACATTAGCTCTCACCGGAGTTAATTTATGTGTAGATAAAG  
CAGTTGTACATCACCTGATCACTCCACAAAAAATAGAAAATATATACTGCC  
AGGAAATTCTGAAGCAGAAATACAATAATTTCAAATATTCCGCTATTTGCT  
CCCAATGCAAAACATATATTGCATTGGGAGCATATTCATATTTTTGTTATTCTT  
GTATGAAATCGTCTCATGTACACGGTCCTTTTTTCGCCGAAAACCTGATATTA  
CTTTAATCAAAGTTGACGTGCCAGATTTCGAAGTAAATTTATAAAATATCAA  
ATCAATATACATTTTGCACCTTCGAGATAGTAATGGCTGTTACTGTAACATGG  
GTTACAAATAGCTTCATACCCAGAGCTACTGATGTATCAACACGATTCAACA  
ATACCCGATATTTATTCCATGCCTCCAGCAACGATCTTTCTTCCCTCCGTTGCG  
ATTTCCAGATCTACAGCATCCTGCAGTGGCGCAATATACTCACTGAATTCCT  
GGATGTAGAACTGTGTGGTGACGGTCTTCCAGCCATTTCGGCTCCTGCTGTA  
TCGAAGCATAACCAGGCTATTTCAATATCGCTATGCTGCGGCAGCATTTAACC  
CCTTGTAATTCATCGCCATAATTGATTTAATTCACAAATAAACTATAACATG  
GTGAAATTAATGAAAAAAAACACAGATGATGGGGCTAAAATTTACACACCA  
CTTACCCTAAAGCTTTATGACTGGTGGGTTTTGGGAGTATCAAATCGGCTTG  
CATGGGGATGTCTACAAAGGAACACCTTCTTCCACACTTTCTGGAACATT  
TAGGTAACAACCATCTGGATATTGGTGTGGAAGTGGGTTTTACCTTACTCA  
CGTACCTGAGAGTAGTCTGATATCTTTAATGGATTTGAACGAAGCTAGCCTG  
AACGCGGCATCTACAAGGGCTGGGGAATCAAAAATTAACATAAAATTAGC  
CATGATGTTTTTGAACCTTATCCCGCGGCGTTACATGGTCAATTTGATTCCAT  
TTCCATGTTTTTACCTTCTTCACTGCCTGCCTGGAAATATATCTACAAAAAGC  
TGTGTAATACGCAATGCGGCGCAGGCCTTAACTGACGATGGAACCTCTATAC  
GGAGCCACAATTCTTGGCGATGGAGTTGTGCACAATAGCTTCGGTCAAAAA  
CTGATGCGCATTTACAATCAGAAAGGCATCTTTTCAAACACAAAAGATTCC  
GAAGAAGGCTTAACACATATACTCTCAGAGCATTTCGAGAATGTTAAAACC  
AAGGTTCAAGGTAAGTACTGTAGTAATGTTTTCCGCTTCAGGGAAAAAATAGCAT  
CCAACCGCAGCACGTTCTTGCTTAAGACGTGCTGCGGCATAATCCCAATGA

TTACTCCCTGACAGGGTTCGTAGGCCACTCAATATCAGGTGCAGTTGATGTA  
TCAACACGGTTCAGCAACACCCGATACTTTTTCCAGGCTTCCAGCAACGAG  
GTTTCTCCCTCCGTTGCGATTTCAGATCTGCAGCATCCTGAAGTGGCGCAA  
TATGCTCACTGGCTACCTGCATCAGGCTGTTTTTTGTTTCTTCCGCCTCCCG  
GATCCGGAACAGTTTTTCTGCTTCTGCATCTTTCACCCAGGTTGTGCCGTTT  
CACTTCTGAAACTCCCCTTCCGGGGATAACCAGGTGACATTTTCCGGTAAT  
GAGCCGAGTTCAGAAATAAATAACGCGTCGCCGGAAGCCACGTCATAGAC  
GGTTTTACCCCGATGGTCTTCAACGAGATGCCACGATGCCTCATCACTGTTG  
AAAACAGCCACAAAGCCAGCCGGAATATCTGGCGGTGCAATATCGGTAAGT  
TTTGCTGGCAGACCTGTATGAGGCGGAATATATGCGTACCTTCACCAATAA  
ATTCATTAGTTCGGGCCAGCAGATTATAAATTTTTATGGTCCGTGGTTGTTCA  
CTCATTCTGAATGCCATTATGCAAGCCTCACAATATAGTTAAATGCGATGTTT  
TTGACGGTGTTTTCCGCGTTACCAGCAGCGTTAACGGTGATGGTGTGTCCA  
TGTGAGCCAATCGCAACCGAGTGCGTATGAGCACCAATACCGACAGTATGT  
GCGTGTGCACCTGCGCTTGCAGCAGTGCCGGACAGTGAGTGGGTATGTGC  
GCCAGCAGATGATGTTGCATAGTTTTGATTATGCACAACAGACAATCTTGTT  
GATGCACTACCAGCACCGGAGTTAGCACTAGCCGTGTTACGTTGGCTAGT  
GAGTGTGTGTGTGCTCCAGCCGAGTTTGTAGAGCCGCTCACACTGTGTGTA  
TGTGCCCCGGTGTATTTCGTAGATTTAGTGCCGTAATCAAACGACGATGTGG  
TTTTCGTACCCAAATCCGTACTTGATGCGCTGGCGCTGTGGGTGTGCGATTT  
AATGCCGTCTGTTCTGAGACAATACGGCACGACCACTGGCGGGCTTGCC  
CTTAATCGTCCAGCCACGCATATCAGGGATCACGCCTGACGGATAAGCAAC  
TGCAAGTTTTCGGGTATGCAGATTTGTCAAAGTCTGCCCTGCATCAGGGC  
ATAACCAGACGGAACGGTATCTGATGGCCACGGAATTGGTGCGCCAACTGG  
GTAGCTTTCTGGTGGAAAGATTTTTCGAGGTATAAACTTCTGCCAGTCTTCC  
TCAAACCATAAACCGTCTCTTGAAGAACGGTAGAACAGACCACCATTTCTG  
TAATGCGCCTTCATCTGCAGGGTCCGGCAAATTCGACTCCGGTATAGAAG  
TTAACCGAATATAGCTGTCGCCAGAGCGGGTGACATTGTAAGCGCCTGAT  
TCGGCATTCCATGGAACGCCACCATCCGCATCGGCATATGTATCCGTTGCC  
TTCTGGCAAAGCAGCCACATGCGCGGGCGTTAAAGTAATATCTTTGGAAC  
CATCAAACCAACACCAGAAACCCGTCTTGGCGTTTGCAGCTTTGTTGCTG  
TTAATGCATTACCGTTCAGACTTGCGGACAGTTTGGTTCCAATAACCAGTTC  
GCCGGTTGCGTTATCAATAGCAAACGGTCTTAATGTATTCCAGCCACCATAA  
ACATCACCTTGATTGGTAAGCAGCAGGTAAGTTTTAGCGCCATCATTACGCC  
ATAATGCACCATACTCCCACCTATCATTTCGAATCTGATTACCACCACGCGCT  
ACAATTTCTGCTGTGGCAAAAAGTTTTTTGCACGACAAGTTATCGTTAACG  
ATTAACGAATGAGACTCATAAAAACCACGCCACTCTTAAAATCAAGGATA  
ACGTCCGCCGCGATACATTCAGTCGCCGGATTTGTTGCCCCAACTTATAGG  
TCGTATCATTAAACAACGAGATCAGCACCAGGTGCGGATATTGACAGGCCAT  
CTTCAATAAACGCAAAAACAGGGAAAGCAGCGCCATCAACATAGAACACA  
GAGCGCAAATCATCGCCCTTATTACTCATCATTATTGAGTGAATGGCTCGTT  
CATTGTTTTGATATTGCCAGAACATGCCATAAGCATAACGCCCCCTGTCAGT  
CCAGCCACCAGGCATAACAAATCCGTAAACTCGCAGTTATTCATCGGATC  
GCCTGCGGTTGCGGTTGCCGTGGTGATAATGACTCTTGATGCCAGTTCGCTT

ACTGAGCCAGCAGAACGCATAACAACAACAGGGTAATATTTTCCAGATGTT  
GCACCTGCAGGAGCGTTAACCCGCACATAACGCATAACCACGCTTATCAGCA  
AAGTCTGTTTTACTGACCGCGTTAATGTTGTTTCAGGAAGCATCCCTTATCGG  
GTATATCAGCGCCGTTCTGGTCTTTCTGCAGACGTTTCTCTGCATTGTCATA  
GGCTGATTTTACTGCCTTTGGCGTTGCCGCCAGCGTTTCAGACGTA CTGTTG  
GTCGCACTGCTGAGCTGTA CTATCCCCTTTTTTCGTCGTA CTGTCATCCTCAA  
GCGCCACGGCGGATGCAATATCCTCTGCCCGTTTAGCTGCTGTCTCGGCGC  
GCGTTGCCGCGGATCCGCGCTACTTTTGCTCTGAGCTGCCGCCGTCGCAC  
TGCCAGCAGCCTCTGTGCCTTCGTGGATGCCGTCGTGGCGCTGCTCTTCG  
CTGCTGACGCTTGTCTGGTCGCCTCATCTTTTGAAGCAGACGCCGATGATG  
CCGATGACGCCGCCGA ACTGGCTGACGATGCGGCAGCCGTTTTTTGAGGATT  
CTGCGCTTGTTCGACGCTTTCGCGTTCGTTTCGGATGTCTTCGCTGCGGA  
AGCAGACCTCGCTGCTGCGCTGGCCTGTT CAGTGGCTTCGCCAGCCTTCGT  
TGTGGCTGTTGAAGCAGACGATGCGGCGCTTTCTGCCGATTTTCCGGCGGC  
GGTGGCACTGGCTGAGGCCTGCCCGGCACTTGTGACGCTGCACTGGCAG  
ACGACGCAGCCGCTGTTTTTGAGCCTGCCGCAGCCGAGGCGCTCTGTCCC  
GCTGCCGTTTCAGAAGACCTGGCGTTCGTCTCGGACGTTTTTTGCCGCCTTC  
GCGGAATTTCTGCCGCGTTGCCGAGGAAGCTGCACTACTGGCGCTTGAT  
GATGCGTTCGTTTCTGATGATTTTGCCGCTTCTTTTGAGGCCGCCGCATCCC  
GGGCCGAGGTCGCAGCTTCTGATGCCCTTCGTGGTCGCGGTGGATGCAGATG  
TGGCTGCTGATTGTTGTGACGCTGAAGCATTCGTTTCTGACGTTTTTCGCCGC  
ACCGGCACTGGTGGCCGCCGCGCTTTTTGAGGACTCTGCAGCGGCAGCAC  
TTTTTGATGCTTCAGTGGCCTTTGTTGATGCCGTTCCCTGCGCTGGAAGACGC  
TGACTGAGCCGACGACGCGGCCTGTCCGGCTGACGTGCTGGCTGCGCGTG  
CTGAGCCTGCAGCATCAGTCGCATGGGTTGCCGCCTCACGGGCTGATGTGC  
CGGCATCGCTGGCTGACTTCTTCGCGGCTGCCGTGTTCTGTGCCACCGCGG  
ACGCGTTACGCGCCACCTCTTCCACCATCAGTTCAAAAACGGCGCAGTGCCT  
CAGGACGGGCATCATCTCCGTCATGGCACCGAGAAAATCATT CAGCGTAC  
CGGGTCGGGAATCTTCATACACGGTGATGGTCCCGGCATGTGACGGCGGGA  
ATCCCTCCACCAACAGAATAACGCTGTA CTGCCCCGTA CTCAACGTCCATGC  
TGTAACGCCCGGCTTCATCCGATTTTCTGAGGCCAGCGTGTT CACCACCA  
CCGTGGTGCTGTTACGTTTTGCTTTCAGCTGGATTGTGCAGTTCTGTACCGG  
TTTTCTGTGCCGCTTTCAGTACACCTGAAATCTTTACTGCCATATTCACCC  
CACAAAAAAGCCCGCCTGAACCGGCGGGCTGTCATAA CACTGTGTTACCT  
GGCTAATCAGAATTTATAACCGACACCCACGATGAAACCGTCAGTGCGCCA  
GTCACC ACTGCCGAGCCTTCATAAGCAATATCAATGGCCACGGATTCGGT  
CGGGTTAAACTGCACGCCAGCCCCCAGCCAGAGACGTGTTGCTGTGGC  
GACCGTCATCACTTCCGGTCAGCACATCGTGCTTTTTTCCCCTTGTTGT CAGT  
TACGCGAAGATAATCCCCGGAGAAAGTCGACACACGGCTGTAAGCTACAC  
CCGCCATCGCATA CGCGCTGAACCATT CATT CACGCGCACAGACGGCCCCG  
CCATTACGCTGAACCAGCGGTTACGAACGGAATCTTCATGCCAGCGGGTAT  
CGCTGTAACGGGTCAGCTGGCGATTCTTGTCTCCTGCATAGCTGAATGACG  
TCACCAGCCCCAGTGTGTCCGTAAACTCATAACGGTATTT CACGTTAATCCC  
GTT CAGATCATCACTGCCGGGGACGTTTCGT C GAGGCATGAAGATACCCCGC



GCTCAGCGTGGACTGATGTTTCAGACGCCCATGCAGGCGCACCCGGATACGG  
CCAGACAAATGGCTGCGGACAAAATTGCTGCACAACTTTACGCATAATTA  
CCTCTCGCTTTTCTGCAATAAAAAAGGCGTCATTCCTGACGCCCTTTATTGG  
GGTTATAAATATTTCAACGAATACTGATGCCGGAAGCGGCTTTTTTGGTCAC  
AATCACCGTACAGTCGGTGATATTGCCTGCCCCCTGATTGCCTTTCTGGAAA  
ATCTTAAACTCCAGAGTGACGCTTCCCCTGCCACTCGGCATATCAATAACTG  
CACTGTA ACTACCGGGAATGGCCCCTTTAGTTTCTCTGGATGCGATTAATAC  
GCCGTTTTTGGCAACTTCAAACCATAACCCGTGTATCGCGTGCCTCCTGG  
GTTATTTCCGCTCCCCGGATCGTCATACGCTATAACCGTTAAAAATAATGGGC  
GGAATAATAATCTGGCGGTCAAAGTTATGATCATCGCTGATGGTGACTGTAA  
CCGTACCGTTTGGTGTTCGGTGTACCCACGTACCGACTTTTTTCGGGAA  
GGCTTTTGATACAGCTTTAACGAAATCTCCTCTGACCTGGGTGCGCTCCAG  
CATGCCCTTAATCGTACAGTTCTGGTTAATCGTGACATTGTTGAGCGTTCCT  
GAGTTCGCATTCACACTGCCACTGATATCCGCATTTTTTCGCCGTCAGTCTC  
CCGTCTGATGTCAGGGAAAATGCCGGAGGATTACCGCCGCTGGTAATAGTG  
GGGGCCGTCAGGCGTTTCAGGAACACTTCATTCATGAATATCTGATCGCCCT  
GACCAACAAACATCGGCTTTGTGTTGCCATTTCGCAGGATTAATCATCGCAAT  
CCTGTCTGCTGCCAGCAGCACCTGACTCTGCATGCCGTCAGGGGTGTTCTC  
AATACCGGCACCGATAACCCGCAATATAAAGGCGTCCGTCCTGCATCTGCTGC  
AGCTTCACTGCCACATGCTGTTTCAGGTTATTATTTGTATCAACCTGAACCT  
TCTGTATCTGCTGGATCGCTGCACTCTGGTCTTCCAGTTTCTTATTGACGGT  
CTGTGTTATTTCAATTGCTGACATCCGTTATGGACGTCCTGATTTTCAGTCAGG  
TCAGGCGCAAGCTGACCGTTATCAATCTGCGTCCACAGCTCCTGAGCCAGA  
TGGGTTTTCCCTATCTCGCCTTTGAAAAAATCCAGATAGCCTGATGCATCAT  
CACTCGGCTGACCGACAGCCTCCACGAATGCCGATTTGCCAACGGTGTTC  
CACTGCGAACGTAAAAATAAATCATGGCCCGGTTTGATATTGATACTGGC  
GGCTATCCAGTACAGTGCCGTACCAAGATAACGCGCGCTGGTTTCAACCTG  
CCTGATATCCGCAATCCGTTTTTCCGAGAACCAGAACTCAAACCTGTACCGT  
CGGGTCATAAACCGCAAGATGCGGCGTGGCGGTTATCTGAAAATAGCCCGG  
CGTCAGCTCAATCCGCGACGGCGCTGCCGGTGCGGCAATCCGGAACGATA  
CCGACGCCGGATCGCCCTGCTGCCCCACGCATTTACTGCCCGGACTGTCA  
GCCTGTAGTTCCCCAGAGCCAGTTGTGTGAAGCGGTAAGTGGTTTCCGTCG  
TCCGGGCCGTGCTGACCAGCCGCTCACGGCCGTCATCCGCTGCCACGGTC  
AGGCGAAGCAGGAAGCTCACGCCCTTACCACCTTCGGCGTGTCCCAGCG  
GGCCAGCACCTGGTATTCCCCGCTGTCTGCGGGTGA CT TCTGCGGTG CAGGTG  
CTGCACCGCTGGCGGCGTGACACCATTTACCGTGCCGCTCTGGTCCGCGTC  
AAAGTGCGCCCCGTTATCCACGATGGCCTCTTTTTCCGGTACATGCTGCACG  
GCGGTGATGGCATACTGCGGTCGTCGTTCTCACGGATACTCACGCAGCGG  
AACAGGCGCTGGCGCAACGTCGGCAGCTTCAGCCCCATACTGCTGTATTCA  
GCAACGCCGTCAGGAACACGGCTCACTTTCACCTTCACGCCGTCGGTGAC  
GGACTGAACCTCCACGCTGACCGGACTCCCCTGCCCGTCAACCAGGCTTAT  
CAGCGTGGTGCCGGAAGATGGCAGCGTGATTTACGGTCGAGCGTCAGCG  
TCCGGGTCTGGCTGTTTACCGCCAGCACGCGCCCGCCGGTGCGGATACCGG  
CATAGTCATCATCGCAGATTTCAATGACATCGCCCGGTACATGGCGAAGCCC

TTCGGCACCCACGCTGAAGTCCACGGTCTGCGTTTCCAGCAGTTCTGTTTT  
AATCAGCCACAGCCCGGCGCGGTGTGCCTGCCCCGGCTGGTACAGCCAA  
AAGCATCCATCTTCGTGACGTTACGACCGTAACGGGCAATGGCCTGCGTGT  
CCTCCACAAGCTCTGTGCGCGTCTCCAGCCGTTATTCGGGTCAATCCAGT  
CACCTCAACGGCATTATGGCGGTCTTCAGGGCGCTGAAGCTGTAGCGGAA  
CGGCGCACCATCATCCGGCATCACCACATTAAGTGCAGGTTATAGGTCCACACC  
TTATCCGACGGTTCGGTCTGCACGAACGTCAGCGTCTGCCCCGTTCCATAACC  
GGCATAACAGCGCATCGCAGAGCAGAAATCACTGAGCACATCCCACGCCTTG  
CGCTGTGTGGTCAGGTACGCATTACAGGTGATGCGCGGCTCCGTGCCGCCA  
AAACCGTCCGGCACCGACTGATCGCAATGCTGGCCGATGACATAACAGCGCC  
CATTTGTCCACATCCGCCGCACCAAGACGTTTCCCCATGCCGTAGCGCGGA  
TGGGTCAGCATATCCCACAGACACCAGGCCATGTTGTTGCTGTATGCTGGC  
TTAAACGTTCCGTCCCAGATACCCTGTATTGCCGCGTCTGCGGGTTATAGT  
TCGACGGCACCTGCAGAATGCGCCCCGCGCAGATGATAATTACGGCTCACCT  
GCTGGCTGCCGAACGCTCCGAATCCACCTGCACGCCGACCAGTGCCGTG  
TTCGGGTAGCACTGTTTCACATCGATGATTCGGTGTATGACGACCAGAGC  
GTTTTGTTCTGCAGCTGGTCTGTGGTGTGTCCGGCGTCATCCTGCGCATCC  
GTATATTGAACGGGCGCGGCGGCAGGTTACCCACCACCACCGAGGCCAGAT  
ACTGCGAGGTGGTTTTGCCCTTAATGGTGATGTCTTTTTCCGTCACCCAGCC  
ACCATTACGCTGGATCTGAACCAGCAGGGCGACTTCCGACGGATTCCGGTC  
CCCCTTTGAGGTGGTTTCCACCAGTGCCTGCACGCCGAAGGTAAAGCGCA  
GACGGTCGATGTTTGCAGACGTAATGGTGCGGGTGATCGGCGTGCATATT  
TCACTTCCGTACCCAGCACCGTCTCGGAGCCGGAGGATTCAAACCCCTCCG  
GCGGTGTCTGCTCCTGCTCACCGGCACGGAACACCACCGTGACACCGGAG  
ATGTTGGTATTCCCCTCAGTGTCCAGCACCGGCGTACTGTTTCAGCAGCACG  
CTTTTAAATCCATCCACCGGACCTTCAACCGGCCCTTCGCTGATGGCATCGA  
TCACACTCAGCAACTGCGTGGACTTCAGGTTGTCCTTCGCTTCGCGCGGGG  
TATGCCCTTACTGCTTCCCTTACCATTCCCTCACGCTCCATAAATGACAAA  
ACCGCCCGCAGGCGGTTTACATAAAACATTTTGCATCAGCGACCAATCAC  
CACAACCTGACCACCGTCCCCTTCGTCTGCCGTGCTGATCTCCTGAGAAAC  
CACGCGAGACCCACGCGCATTTCCCCGTACAGAACAGGCAGAACATTGC  
CCTGGGCAACCATGTTATCCAGTGAGGAGAAATAGGTGTTCTGCTTACCGT  
TATCCGTTGTCTGTGTACGGGGAGTTCTGGCTTTCGGTGCCAGCATCTGCGC  
CACACCACCGAGCACCATACTGGCACCGAGAGAAAACAGGATGCCGGTCA  
TACCACCGGCCCAATGGCTGCCCCCATGCTGCAAGGGTGGCTCCGGCGG  
TAAAGAATGATCCGGCAATGGCGGCAGCCCCAGGACAATCTGGAATACGC  
CACCTGACTTGGCCCCGGCGACTCTGGGAACAATATGAATCACAGCGCCAT  
CAGGCAGAGTCTCATGTAAGTGCGCCGTTAACCCGGACGTGCTGACGTCCC  
GCCCGCAATCCGTACCTGATAACAGCCGTCGCTCAGTTTCTGACGAAACG  
CCGGGAGCTGTGTGGCCAGTGCAGCGGATGGCTTCAGCCCCGTTTTACAC  
GAAGGTCGATGCGGCGGCCAAATCGTTGCAAATCCCCGTAAAGGCAGATG  
CGCGCCATGACCGGTGACGCCAGAGGGAGTGTGTGCGTCGCTGCCATTTG  
TCGGTATACCTCTCTCGTTTGTCTCAGTTGTTTCAGGAATATGGTGCAGCAGCT  
CGCCATCACCACAGTAAATGGCGGCATGATTCGGCACCGATGAACCAAAAC

AGCACAGCAGCACATCGCCCGGTTGTGCTGATGACAACGGCACCTGATAC  
AGCCCTGTGGCCTCCAGATTATCCAGATAGAGATTCTGACCGTGACGCCAC  
CAGTCATCCCCGCGATGAAAATCCGGCATCTCAATCCCCGCCAGATGATAA  
GCATCCCGGAACAGCGTGTAACAGTCCGTCACCCCGTGCTCAAAGCGCCG  
CCCGGTGAGATGCGGCACACAGCGGAACTTGTGAATCGCCCCCGGCAGA  
CCAGCCACCACGGCAAATCACTCTGCACCTGCAGCCGCCGGTCAGCCTCA  
CTCAGCCAGGGCAGACCACCGGGGTGGCTGTGGACCAGCGCCACAATCTC  
ACCCTGCATTTCTGCCTGCAGCCAGTCTTCCGGCGACATACGGAAATACGC  
CTCCGGCTCACCGGAGATATTCACGCAGGGGAAATATCTTTCCCCCTCCGG  
CGTGCTTACCACGAAGCCGCACGACTCCGCTGGCGCACATCGCCGGGCGT  
GCGCCAGAATCGCTGATTCTGTCTGTGTCATGGGATTTACTGCGAAAGTTTG  
TTAATGGAAAGGAAGCCGCCAAAGTTGCCGACGTTATTGCGAAACTTACAG  
CCGCTCAGGCATTTGCTGCATTTATCCTTCGTGATATCGGACGTCCGGCTGGT  
CATATTCATCCGCGACTGCCGGACCGTGATAACCGCACTCATCACCGCGATA  
GGTCCAGGTGCAGGTGTTGGCCAGCATGATACGTCCCGGAAAAACAGCGC  
CATCCGTTTCCGTCGGCGTGGACAGTACAAAGGAGGCACTCACCGCGCTC  
AGTTCGCTGCACTGCTCGATGCGCCAGCGGCTGATCACCTCCTGCTCCGGA  
TCGGCGTCACTGTTTCCGTTGACGAAGTTCACCGCATCCAGAAAACGGGC  
GTAAACCTTACGCCGGACCACCGTTCCGCCGACCAGACTCTGCAGATCTC  
CGCCATCCCGGTGACCATAACCGTACAGGTTAGAAACCGTCAGCGTGGGGCG  
CGTACTGGTGCCTTTGCCATTCAAGTTCAAACCCTCCCTGAATGGGATA  
CGGCTGATACTGTCGCCCTGCCAGGTGACCGGCACACCTTTTTCGTTCTG  
CTCATTACAGAAAAATAACGTTCTCCACCGACCTCTGTCAGGTTCGATTC  
CCAGAGCACCACGCTGGCCGACTGCTCCGCACGGGTGCATTCATTCAAGTGT  
TTCCTGCCGGATATCCTGCATCAGTTCACCACCTGTTCAAACCTCTGCGCTGA  
ACTCAACACGCAGCATACTGACCCGCGACGACCATTTTGCGCAGGTACCT  
TTATCTGCCGCCACTCATAAGGCGGGCGTCCACAGAAAGGCTTTCCAGCCCC  
CGTGCTCTTCCAGAAACGACTCCAGTACCGTGGCCTCCTCACGGGGGACA  
GAAAGCGTCACGCTGTACGTTTTTCAGGTTGGCATTACAGCCCGGCAGGCGCT  
CGCTGGGAATAGCCATACCAAAGCGCACCTTTCTTACAGAAGGGGCCGA  
AGCCACATCCATAACGGGTTTCACTTTCCAGCGGAAGGTTTTTCATCGTCCA  
CCTCCGGAGAACAGTCCACCATCACGCATCTGTGTCTGAATTCATCACGG  
GCACCCTTGCGGGCCATGTCATAACCGCCTTCAGAGCAGCCGGACCTATC  
TGCCCGTTCGTGCCGTCGTTGTTAATCACACATGGTTATTCTGCTCAAACG  
TCCCGGACGCCTGCGACCGGCTGTCAGCCAGACTGCCCGGTGTACCGACAT  
AACCACCGGTGGCATAGCCGCGCATCAGCCGGTAGAGATTTCCACGCCAA  
TCCGGCTGGTTGCCTCCTTTGTGAAGACAAATTCACCACGGTGAACAATCC  
CCGCTGGCTCATATTTGCCGCCGGTTCCCGTAAATCCTCCGGTTGCAAATG  
GAATTTGCCGCGAGCGGCCTGAATGGCTGTACCGCCTGACGCGGATGCGCC  
GCCACCAACAGCCCCGCCAATAGCGCTGCCGATACTCCCGACAATCCCCAC  
CATTGCCTGCTTAAGCAGAATTTCTGTTCATCATGGACAGCACGGAACGGGT  
GAAGCTGCGCCAGTTCTGCTCACTGCCGGTCAGCATCGCCGCCATATTCTG  
TGCAATACCATCAAAGGTCTGCGTGGCTGTAATTTTACCTGCGACATACTG  
TCCGTGGCGCTCTCTTCCCACTCACTCCAGCCGGACTTCAGGCCTGCCATC

CAGCTCCCGCGAAGCTGGTCTTCAGCCGCCAGGTCTTTTTCTGCTCTGAC  
ATGACGTTATTCAGCGCCAGCGGATTATCGCCATACTGTTCCCTTCAGGCGCT  
GTTCCGTGGCTTCCCGTTCTGCCTGCCGGTCAGTCAGCCCCGGCTTTTCG  
CATCAATGGCGGCCCGTTTTGCCCGTTGCTGCTGTGCGAATTTATCCGCCTG  
CTGCGCCAGCGCGTTCAGGCGCTCCTGATACGTAACCTTGTCGCCAAGTGC  
AGCCAGCTGGAGTTTGTACTCCAGCGTCTCATCTTTATGCGCCAGCAGGGA  
TTTCTCCTGTGCAGACAGCTGGCGACGTTGCGCCGCCTCCTCCAGTACCGC  
GAACTGACTCTCCGCCTTCCACAAATCCCGGCGCTGCTGGCTGATTTTCTC  
ATTTGCTCCGGCATGCTTCTCCAGCGTCCGGAGTTCAGCCTGAAGCGTCAG  
CAGGGCAGCATGAGCACTGTCTTCCCTGACGATCGCCCGCAGACACCTTAC  
GCCGGACTGTTTCGGCTTTTTTCAGCGTCGCTTCATAGTCCTTTTTTCGCCGCC  
GCCATCAGCGTGTTGTAATCTGCCTGCAGAATTTTCCCGTCCTTCAGTGCCT  
TGTTCAAGTCTTCCCTGACGGGGCGGTATATTTCTCCAGCGGGCGTCTGCAGCCG  
TTCGTAAGCTTTCTGCGCCTCTTCGGTATATTTTCAGCCGTGACGCTTCAGTA  
TCGCTCTGCTGCTGCGCATTTTTGTCTGTTGACTCTGCTGTTTCAGCCTTCT  
TTCTCGCGGCTTCAAGCGCAAGACGGGCCTTTTTCAGATCATCCAGTAAC  
GCGCCCGCGCTTCATCGTTAACAAAATAATCATCCTTGCGCAGACTCCAGAT  
GTCGTCCGCTTTCTTAAACGCAGCCTCTGCCTTAATCAGCATCTCCTGAGCG  
GTATCAGGACGACCAATATCCAGCACCGCATCCACATGGATTTGAATGCC  
GCGCTGTCTGTCTGCCAGGTCTCCAGCGTACCCATGTTCTCTTTCAGGC  
GGCGGGTCTGGTCATCAAACCCTTTCGTGCGGGCCTCGTTCCGCCGCTGCA  
ATGCCCGGCTTCATCGCCGGAACGCTGCAACTGAGCAACATACGCAATCT  
GCTCCGCCGTACGTTATGGAAGTGGCGTGCCATCGCTGTCAGCCCTGACG  
TCGGGTCTGTGGTCAGCTTCCCGAAGGCTTCAGCGACCTTGTCCACCTCCA  
CGCCGGATGCAGAGGAGAAACGCGCCACACTCTGGCTGATGGATGCAATC  
TGAGCCTCACCGCTTACTCCCGCCTTAACAGTGCGCTGAGTGACTCGCTG  
GTCTGGTTAAACGTCAGCCCTGCCGCCTGCCCGGCTCTGGACAGGACCAG  
CATACGATCTGCCGTCAGACCCGACTGATTGCCGGAAAGGACCAGCGTTTT  
GTTGAAATCGGACAGGGTTGAGTTGCCCTGATACCAGGCATACGCCAGCGC  
ACCGGTCGCCACCGCCAGCGAGGTGGCCCCGACCATCGGCAGGGTGATCG  
CACCGGCAAGCCCCCTGAACATGGGGATCATCCCGCCGAAGGAGTCCTTC  
ACCTGACCACCCTGTTGCAGCAGGATCAGCCACGGACTTTGCCTGCCTGCA  
AGCTGCGTGGCCACGTTCGGTGAAGTGCAGGAGCAGCATAACGATGGCAGC  
TTTATACTGCCCGACGGAAATCCCCGCTTTCTGTGCAGCCAGCGCCTGTGC  
GCTCAGCGACTGTTCAACGACTGCCGCTGTTTTTTTTTCGCATCACTTTCCGTA  
CCGGAAAATGACGCCTGACTCTGGCCATCTGCTCGTCAAATCTGGCCGCA  
TCCAGACTTAAATCAACGACCAGATCGCCTACCGGTTTCAGCCATACCGGAC  
TCCTCCTGCGATCCCTTCTGATACTGTCATCAGCATTACGTCATCCTCCGTCA  
TGTCGCCACATCCGGGGAAACGGGGATAACTTCATTCACGTCCGGGCCAA  
AGCGGACGCCTCCGGCAAGCCCTGCCGCTTTCTGCATCAGCACATCATCTT  
CAGGCTCTTCGTCAGCCTCACGCCGTTTCAGCAGACTGAAATCCAGCGGAT  
GCATATCCGGATCGCTGAAAAACAGGCTGAGCACGGTGTACGTCAGCCCCG  
GAAAAGTGCATATCCAGCAGAACATCATGAAAATAATGGGTACTGTAAAAG  
CGGTGCCAGTCGGCATACTCCGTGGATGACATCCCGGCAAGCATGGCACGC

CAGTCGGGTCGCCCCATCTCGCGCGCCAGTTTCAGGGCAAAGCTCAGCTC  
ACCGTCGAACACTTTCCCGCAGAAACAGGCTCTGCAGGCCCGGCGTCCTC  
TGCTGTTTCAGGGGCATCATTACCACAAACTCATAACATACCGGACAGCCG  
GTACACCACGTTTTTCAGCATGAGAAATTGCCTCTGTGGGCCAGGTGGTAAG  
CACTTCCTGCTCAATCTGTTTAACGGCTTCATTCATGGAAGGCTGCTTTGTC  
TTCTGCGGATGGTTATGCCACAGGGACATAGCCACCACAAAAGCACCGGTT  
CTGATGGCGTCTTCCACAGTAAACTTCCGGTTGCTGTCTGACTCCGCCTGTT  
CTGCCTGCCGTTTCATCAGGGCGAGATGCTCAATACGCTGCAGGGCTGACA  
GTTCAGAAAGCGTGACGGTCACGCCGTTATGTTCAAATGATTCGGTTTTCA  
GGAACATCGCTGACTCTCCGGATTAACTGTCGGTGACAGTGATTTCTGCAA  
CCGCAGCAAGTTCACCATTACCGGATACAACCGGAATGTTGACCTTACCTG  
CAGCAACGCCTTTCACGGTGATGGTCATACTGACCGACACGGTGGCTT  
TTGTTTTATCCGCAGACACCGCACGAAAGCTCTTGTCGGTTACGCCCTCCG  
GCTGGAAGGCCACGGTCAGCGTGGTGTCTGCCCCTTTCACCACCGAGGTG  
CTGGCAGGCGTCACGGTCATGCCGGTTGCCGCTGTTACCGTGCTGCGATCT  
TCTGCCATCGACGGACGTCCACATTGGTGACTTTCACCGTGCGGGTGATC  
ACTTCCTTCGCCGTCACCGCCTTACCGATACTGCTGACCCAGCCACGGAAC  
ACATCGACCGTGCCGTTCCGGGAAGCGGATTTTATAGGCACGGGTATCGCCT  
TCATTAACCACGCCAGCAGCGCCTGCTGCCCCTGCTCTCCGGGCATCCAC  
GCCAGCGTGAAGCTGGTATCTCCGGCAGATTTCTGCCCTGCCCGGTGCGA  
GTCCAGTCTGCATCTTCATCATCGAGATAGCTGTCGTCATAGGACTCAGCGG  
TCAGTTCGCCGGGCGTCAGGTCTTTAACTTTTGCCAGACGCGACCAGTCAA  
CGTCTGAAAGCGGATTCGCATAAGGGTCACCGCTCCCCTTATAAACCCACA  
GGGTGGTCCCGGCACCTTTCACCGGCATTGTAGGATTTGGTACAGGCATAG  
CGTCCTCACATTTTCATAGGTAATGACATAAGTCAGATCGGCTGAACTCCACA  
GGCCCGCATCATCGTCGCGCCGGTAGTCATAGCCGCTGGCCACCATACTGG  
TGATCAAATCTGACAGTGCCGGGATATCGCTCATCACCGGATAAATCCGGG  
ACTCCATCCACGCATCCAGCTCTGAATCCGGCACCTGAGCAGGCAGGAAA  
ACTTCGATATGCAGCTCCGCCTGCCAGGTATCGCTGTCCAGCTCTTCGCCCCG  
TGTATTCAGCGCCGGTGAGATAAACGGCAACTGCCGGAAAATCCGCCTCAT  
CAAAAACAGCGGGGCGACCATCAAAAACGTCGCCCCCGGTGTCATGCTTC  
TCCAGTGCATCCAGTACGGCTGCACGGAGTTCAGTATGTTTCATCGCTTTAT  
TACCATCCTCAGTTGATGCTGCAGCGCATAGCCCAACTCTTTCGGAAGACG  
TTCACGCCGTATCCGCTCAATATTTTGTAAACGCCGTGGTCAGCGGCACC  
GCCATCGGGATTTTCACCACATCAATGGGGTAACGGTTTTTCCC GGCCACA  
CGCTGCATGACATGCCACCGGCCATTTTTCAGTTGCTGAATAAACGCGCCG  
GGAATACGACGGTTTCCACCACAAGCACGCTGCCGCCACCTTTCAGGGCT  
GAACGCTGCCCTTTTTACGACGCCTGCGTCGGGACAGGACAATCCGCGC  
GTTACCCAGCTTTATTACGGGCAAATCCCCCGGTTAACCTTGATTCTGGCC  
TGCGGATTTTTGACCGTGGCCCTTTCAGCCTGGCCCTTTCCTTACCAGTT  
TCCGGCGTACCTTTGTCTCACGGGCAACCTGTGACGCCGACTGCGATATCG  
CGGATGAAGCAACGCGGTTAATGGCCATTGCGGCGGCACCGGGCACCGCC  
GTTCTGCTGATACGGCTGAGGTTTTCAACGGCCTGCTCAAGACCTTTTATG  
GCCATACATCCCCTTTCAGCGGCGACGGTTAACGGCAGGCGGTACGCCCC

GCCCAAGCCAGAGATGACAGCTTCCGCCATCATCCGGCGAAATCCGGTCCA  
CCCAGAAGTTTTCTCGCCGATGGTCAGTGTGTCTCCACGCCGCAGCTGCC  
GCACATCATCAGTCCGGACAAACAGGGGACGGGCTGGAGCCTTCAACGCGC  
ACCCCTGTCCGGCATAGCTGATATTTTCAGGGTCATCAAAAACACCACGTA  
TCACAGCACCGGACAGCTCACCGGATGTCATGGTGGCTGACGTTCCCATGT  
ACCCGCGTATCGTTTTATCGGGCGGGCAATGGCAGCATCGAACAGGTTAT  
CGGAATCAGCCACAGCGCCTCCCGTTATTGCATTCTGGCCAGGCCATGTTCT  
GTCATTTCCGGCTGCCACACCGGCAGAGACACGAAACGCCGTTCCCGGCAG  
CACAAATGCCACAGGCTCATCCCGCGTGGCGTGAAGTGCATCAGTATGCAG  
CGTCACCAGTGCCACGACCGTGACCAGAGCAGCCGTATCAATCACGGTATC  
CGGCTGCGCTGATAACCTCATTTCATGCCCGGTGAGCGCATTTCGGGG  
CTGACAGATGTGTCCTGACCGGCAGCGTCATCCGTGTCATCAAGCTCCTCT  
TCCAGCTCTGCCACACGGAGTGCCAGTTCCTTCTTCGTCCCTGTCAGGCTG  
ACATCACGGTTCAGTTGCTCACCCAGCACCTGAAGACGGGCAATCAGTTCA  
TCTTTCGTCATGGACTCCTCCACAGAGAGAAAATGGCCCCGAAGGGCCATG  
ATTACGCCAGTTGTACGGACACGAACGCATCAGGGTCAGCCAGCAGCATC  
AGCGGTGCTGACTGAATCATGGTGAACACGCGCCGGATCGCCGGTGGT  
CACCCAGTTTTTCGGGTAGCGGGCAGAGGCGTTAATACCTTCGCGCTGTGC  
GTCCGCATCCTGAATGCAGCCATAGGTGCGCAGACCGCGTGCCTGAGTGTT  
CCCAGCACCATCGTGTTGTCCGGAAGGAAGTTCTTTTTGACGTCGTTTTTC  
CACATACTGTCCGGAATACACGATGATCGCCGTATCGCCATACATCCCCTTAT  
AGGACACCGCTTCGCCAGGTCTTTTACCGCTGTCTCCAGCTCGGAATTAG  
AGCCGCGACGGGTATCCAGCTTCTCCTTGACGGCTTTGAAGGAACGGAAC  
AGCGCCCAGCCTTTCCGATCAAACACGATGATATTCACCACACCGCTGGCG  
TTCAGCGCGTAGGCTTCGATATCGTCGGTCGGGTCATACGTGGACTTGTAC  
GCTTGCTCCACTCCGTACCGCCGGACTGCGTGATGTTGTTGCCACACTGC  
GGCCATATCCACTTCAACCGGATCGAAGGCTTCACCGGTGTCATGGTGTATTT  
GCCCTAAGCACGGCAGAACTGCCTGCATCTCTTCGACCTGAGCAATGGC  
CAGCTCTTCGTCTCGCATGTTCTGCAGGATGATGCGACGGCGGCGGTAAGC  
CGGGTCCGCCAGATTCTGTGGATCTTCATCCGGCAGGCGACGCAGGGTCAT  
CTGCGGATTCACCTCATGCTTGGGTTTGACATATCCCGGTGTAAATTCAGAG  
GTGGAGCCGCCACGGGAGCGGATAACCTCACCGGAAACAATCGGCGAAAC  
GTACAGCGCCATGTTTACCAGTCCCGGAATTTGTGAGAGATAGACTTTCTCC  
GTGGTGAAGGGATAGCTCTCACGGAAAAAGAGACGCAGAAACAGCGGAT  
CAAACCTAAATTTCTTCTCATTTGCCGCCAGCAGCTGGGCGGTTGTGTACAT  
CGACATAAAAAAATCCCGTAAAAAAGCCGCACAGGCGGCCTTTAGTGAT  
GAAGGGTAAGGTTAAACGATGCTGATTGCCGTTCCGGCAAACGCGGTCCG  
TTTTTTCGTCTCGTCGCTGGCAGCCTCCGGCCAGAGCACATCCTCATAACG  
GAACGTGCCGGACTTGTAGTACGTCAGCGTGGTGTCTGGTCTGGTCAGCATC  
AACCGCCAGAATGCCAACGGCAGCACCGTCCGGTGGTGCCATCCCACGCAA  
CCAGCTTACGGGTGGAGGTATCCAGCATCAGCGGGGTCATTGCAGGCGCTT  
TCGCACTCAATCCGCCGGGCGCGGTTGCCGTATGTGCCGGGTCACTGTTGC  
CCAGCGGCTGGTAATGGGTAAAGGTTTCTTTGCTCGTCATAAACATCCCTTA  
CACTGGTGTGTTTCAGCAAATCGTTAACGGCATCAGATGCCGGGTTACCTGC

AGCCAGCGGTGCCGGTGCCCCCTGCATCAGACGATCCAGCGCAGTGTAC  
TGCGCGCCTGTGCACTCTGTGGTGCAGCTGCCAGAATGCGGCGGGCCGTTT  
CCACGGTCATACCGGGGGTTTCGGCCAGCACGCGTGCCTGTTCTTCACGTC  
CGTGAGCCTCCTCACAGTTGAGGATCCCCATAATGCGACTGTTTTCTGCCG  
CAACCGCTGCCGGTGATCTGCGCGTTTACGTCCGGCTGCGCCGCGCTGGCGT  
TCTCGCCCTCCGTCGCTTGCACCACGCCAGTAACGTCAGCCTGCGAAGCAG  
TGGCTGAAACAGTTGTTGATTGAGTCTCTTTGGTCATTTCGCCCTCCTGAGA  
GACGGGATTTACGTGCATCCAGTGCATCACGCATGACGGTGATCGCATCGG  
TACTGTAAACAAGTTCATCAGCCAGTCCGGCATCAATGGCCTCCTGACCGC  
TGTACACTGCAGCCTCGGTATCCAGCACAGCCTGCACAGACAGGCCGGTAT  
ATGCCGACACCTTCTGTGCAAACATCCGGCGGGTTGCATCCATCCGGGACT  
GCAGTGTTCCTCGGACATCATCCGGTAGATGGCTGTAGGGGTTGCCATCCA  
CCTTATGGCTGCCGCTGTAAATCAGCGTGATTTCCACGCCCTGTTTCTCCAG  
CGCAGCGCCGTAATTACTGTGAGCCATCATGACGCCGATGGAGCCTGTCCG  
GGCGGTCTGCGTGACCAGACGCCGGGAGGCGGCACTGGCAAGCAGCTGA  
CCTGCGCTGCAGTTCATGTCATTGGCCAGCGCCCATACCGGCTTTATGTCAC  
GCACACGGGCGATGATGTCAGCGCAGTCAAATGCCCCCGCCACCATTCCGC  
CTGGCGTATCCATATCGAGCAGAATGCCGTCCACCATCGGGTCACTGGCAG  
CCTGTTGCAGACGGGCGATAATGCCGTTGTAACCGGTCATTCCCGAATACG  
GCTGCAGCGCCCGCTCCGACTGACCAGCGTACCGGACACCGGCAGCACG  
GCGATGCCGTTTCATGACCTGATAACTGCGGGCCTGTCGTGGTCCGTCATCAT  
CACCGGATAACGCCAGCGCCGCGGGTGCCTCTCCGGCAGTCAGGCTGTCCG  
CCGGATACTGCATCCGTCAGGCGGCTGATCCCAAGCTGGCCTGCAAGCGCA  
CAAAAGAAAACCCGCGCATAGGCGGGTTCAAGCATCAGCGGCTCATTA  
AGCCATGCTGGCAATATGCGGGAGATTACGCAGCTCTGCTGTCACTCTTCTC  
CTCCTCTGTTGATTGTCGACAGCCCGGATTCAAATGCCGCAGCCGCCAGGC  
GGGCGGTTTAAGACCGGCTGCACGGCGCTCCATCGTTTCACGGACCTGCTG  
GGCAAAAATTTCTGATAGTCGTCACCGCGTTTTTGCGCACTCTTTCTCGTAG  
GTACTCAGTCCGGCTTCTATCAGCATCACCGCTTCCTGTACTTCTTTCAGAC  
CATCGATGGCCATACGACCGGAGCCTATCCAGTCACAGTTCCCCCAGGCGC  
TGCGGGCTTCTGAAAGCTGAAACGCGCTTTTGAAGGTAACGTCACCACG  
CGGCGAACGATGGCCTCTTCCAGCCAGCACAGAAACATCTGGCTCGCCTG  
ACGGGATGCGACGAATTTTCGCCGCCCCATAAAGTACGCCACGACTCGTT  
CGCACTGGCCCGTGCCGTGGAGTAGTTCATCTGGGCGTAATTCCGAGAAAG  
CTGCTCATAACGAGACACCCAGCCCGGAGCGATATACCGCAACAGTGA  
CTCAAACACGGAGTAGCCGTTATCCGTATCCTGAGCCGCTGTCAGGTTTCAG  
TGAGTACCCCGCATCAGGTGCGGCACTTTTGCGCCTCCAGCCGGACCG  
GTGCTGCGGCGTAATACGCGGCAATTTACCAATCCAGCCGGTTCAGCTTGT  
CCCGCTGCTCCTGACTGTTTCGCGCCAGATAAATAAATCCATCGCTGACTGCG  
TATCCAGCTCACTCTCAATGGTGGCGGCATACATCGCCTTCACAATGGCGCT  
CTGCAGCTGCGTGTTCTGCAGCGTGTGAGCATCTTCATCTGCTCCATCAC  
GCTGTAAACACATTTGCACCGCGAGTCTGCCCCGTCTCCACGGGTTCAA  
AACGTGAATGAACGAGGCGCGCCCGGGTAACTCACGGGGTATCCATG  
TCCATTTCTGCGGCATCCAGCCAGGATAACCGTCTCCTCGCTGACGTAATATCC

CAGCGCCGCACCGCTGTCATTAATCTGCACACCGGCACGGCAGTTCCGGCT  
GTCTCCGGTATTGTTCCGGGTTGCTGATGCGCTTCGGGCTGACCATCCGGAA  
CTGTGTCCGAAAAGCCGCGACGAAGTGGTATCCCAGGTGGCCTGAACGA  
ACAGCTCACCGTTAAAGGCGTGCATTGCCACACCTTCCCGAATCATCATGG  
TAAACGTGCGTTTTTCGCTCAACGTCAATGCAGCAGCAGTCATCCTCGGCAA  
ACTCTTTCCATGCCGTTTTCAACCTCGCGGGAAAAGGCACGGGCTTCTTCT  
CCCCGATGCCAGATAGCGCCAGCTTGGGCGATGACTGAGTCGGAAAAAA  
GACCCGACGATATGATCCTGATGCAGCTGGATGGCGTTGGCGGCATAGCCG  
TTATTGCGTACCAGATCGTCTGCGCGGGCATTGCCACGGGTAAAGTTGGGC  
AGCAGGGCTGCATCCACACTTTCACTCGGTGGGTTCACGCCCGCAACTGC  
CCACCAAATCCGCTGCCACCGCCGTGATAACCGGCATATTCACGCAGCGAT  
GTCATGCCGTCCGGCCCCAGAAGGGTGGGAATGGTGGACGTTTTTCATACAT  
AAAATCCTGCAGGTCCCCTGCGTCGCTGTGTCATGCCGGTCTGCACTTCCA  
GCTCCGCAATGTATTTTTTCAGGTGAGACACGGAAGTGGCCGTAAACTCCA  
CTCTCCGTCCGTCTTTCTGTACCGTTGCCACCCGTTTTCTGTTCATCAGGTC  
ATGCAGTGCCGCACGGGCAGCGGCAAGTTCCTTCTGTCGCGTCATTCATCC  
TCTCCGATAAGGCACGGGCGTAATCTGCCAGTGTTTTCTTGTGGTTGCTG  
CACCATCCTCTTCCCTGCAGGCTCGCCAGCAGTGCAGTGCAGTCCAGCTGCC  
AGCGGGAAATACTGATGCGCAGCGCCGCCAGCGCATAGACGAAGCAGTCG  
AGCGCCTCATTGCGTCGCTTTTTGCTGTCCCACAGTATTTTTTCTGCCATC  
CACCCATTTTTTCGACCTGCTCTTCAGCAGTCAGCTGCTGCGCTTCGGTCAG  
ATCAAAAATATCCGGGTTATTCGGGAAGTGAACGGCACCGGGAAGCGGTTTC  
ATCCCCTTCCGGCGTCAGTGTGAAGCGGTTATAAATCTGCTCTTTCGCGGTA  
TCCGTACCGATTTCCGGTAAGGTAAACCCCGTTTTTGTTCGCTTACGTGGCA  
TGCTGGCCACCGGCTTTCCGTAGACGGATGCCCTTTAATGGGGATCACCC  
GGAACAGCCCATGCTTTTTTCGAGCGTTCATACACAATGGTCCGGGTCAATCC  
CGCCAGTATCCCAGCAGATACGGGATACCGACATTTCTGCACCATTCCGGC  
GGGTATAGTTTTTATTGATGGCCTCATCCACACGCAGCAGCGTCTGTTTCATC  
GTCGTGGCGGCCATAATAATCTGCCGGTCAATCAGCCAGCTTTCCTCACCC  
GGCCCCATCCCATAACGCGCATTTTCGTAGCGGTCCAGCTGGGAGTCGATA  
CCGGCGGTCAGGTAAGCCACACGGTCAGGAACGGGCGCTGAATAATGCTC  
TTCCGCTCCACCATCACCTCAGCATCCGGACGTTCCGCCGATTTTCGCTTCC  
CATGTCTCACCGAGCGTGGTGTTCACGAAGGTTTTACGTTTTCCCGTATCCC  
CTTTCGTCTTCATCCAGTCTTTGACAATCTGCACCCAGGTGGTGAACGGGC  
TGTACGCCGTCCAGATGTGAAAGGTCACACTGTACGGCGGCTCAATCTCTT  
CACCGGATGACGAAAACCAGAGAATGCCATCACGGGTCCAGATCCCAGTC  
TTTTCGCAGATATAACGGGCATCAGTAAAGTCCAGCTCCTGCTGGCGGATG  
ACGCAGGCATTATGCTCGCAGAGATAAAACACGCTGGAGGGGTCATCCGG  
CGTCCATTTGAGGCCAAACGGCGTCTCTTTGTGCGCAAATTTAAGATACTG  
CTCTCCCCCGCAGTGCGGGCAGGCAACATGAAAACGCATAAAATGCGGGG  
ATTCAGTGGCTGCACGCTCAATCTGGCAGGTGCCTCTCACTTTGGGCGTGG  
AGCCACGGATGGACTTTGGCCAGACCGAGCCTTCAATACGTTTGTGCGCAA  
GGAACGTCCGGAGAGCCTTCCCTGTTCAATATCCTCATCAAAGGCAGCAAGTT  
CATCATAACCCGCCACATCCACCGACTTTTCACGGTAGTTTTTTGCGGCTTT



ACCGCCAGGCACCAGAAGCCACGACCATTGGAAAAACGCTTCATAGTGA  
GCGTGTTATCCCGGTGCTTTTTGCCATACCACGGAGCCAGCGCCAGCAGCG  
ACGGAATATCGCGGATGGTTCGGCTCAACGTGGGTTTTATAAAGTTCTCGG  
CATCACCATCCGTCGGCAACCAGATAAGGGTGTTGCGCTGCCTATGCTCTAT  
AAAGTAGGCATAAACACCCAGCAGCATTTTGGAATAACCGACACGGGCAG  
ACTTCACCACATTCACCTCACGGATGTAGTCGCTGCCCATCGCATTATGAT  
GGCCCGCTGAAAGGGCAGTGTTTCCCAGCGCCCTTCCTGGTATGCGGATTC  
TTTCGGGAGATAGTAATTAGCATCCGCCATTCAACGGCGGTCTGTGGCTCC  
GGCCTGAACAGTGAGCGAAGCCCGGCGCGGACAAAATGCCGCAGCCTGTT  
AACCTGACTGTTTCGATATATTCACTCAGCAACCCCGGTATCAGTTCATCCAG  
CGCGGCTGCTTTGTTTCATGGCTTTGATGATATCCCGTTTCAGGAAATCAACA  
TGTCGGTTTTCCAGTTCGGAAAACGCCGCTGCACCGACAGGGGGATCCC  
GTCGAGAATACTGGCAATTCACCTGCGATCCGCGACAGCACGAAAGTACA  
GAATGCGGTTTCCACCCTTCAGCGGAGTCTCTGGCATTCTTCAGTTCCTG  
TGCGTCGGCCTGCGCACGCGTAAGTCGATGGCGTTCGTA CTCAATAGTCCC  
TGGCTGGAGATCTGTCTCGCTGGCCTGCCGCAGTTCTTCAACTTCCCGGGC  
CAGCTTTTCGTTCTCAATTTTCAGCATCCCTTTCGGCATAACCATTTTATAACGG  
CGGCAGAGTCATAAAGCACCTCATTACCCTTGCCACCGCCTCGCAGAACGG  
GCATTCCCTGTTCCCTGCCAGTTCTGAATGGTACGGATACTCGCACCGAAAAT  
GTCAGCCAGCTGCTTTTTGTTGACTTCCATTGTTTCATTCCACGGACAAAAA  
CAGAGAAAGGAAACGACAAAAGGCCAAAAAGCCCGTTTTTCAGCACCTGTC  
GTTTCCTTTCTTTTCAGGGGGTATTTTAAATAAAAACATTAAGTTACGACGA  
AGAAGAACGGAAACACCTTAAACCGGAAAATTTTCATAAATAGCGAAAAC  
CCGCGAGTCGCCGCCCGTAACCTGTCGGATCGCCGGAAAGGACCCGCAA  
AATGATAATAATTATCATCTACATGTCACAACGTGCATCTACGCCATCAAACC  
ACGTCAAATAATCAATTATGACGCAGGTATCGTATTAATTGATCTGCATCAAC  
TTAACGTAAAAACAACCTTCAGACAATACAAATCAGCGACACTGAATACGGG  
GCAACCTCATGTCAACTAAGAACAGAACCCGCAGAACAAACAACCCGCAAC  
ATCCGCTTTCCTAACCAAATGATTGAACAAATTAACATCGCTCTTGAGCAAA  
AAGGGTCTGGGAATTTCTCAGCCTGGGTCATTGAAGCCTGCCGTCGGAGA  
CTAACGTCAGAAAAGAGAGCATATACATCAATCCAAAGTGATGATGAATAA  
ACATCCCGGTTTCTTCCACCATCGCACCGGAAAAGCGACTATGAGGGTAAC  
CCTGCGTCTGTGACGACAGTAAAACCCGGTGTGCATCGTTTTTTGATTATCC  
CGCACACTCACGCAGAAGGAATTCCCGTTCGGGCTACGGTCATGGTTAATG  
CGGAATACGGCGACGATACAGCGCAGCTAAAAGGGTAATGGACAGAAAG  
AGCGGTTTATTTTATTCCACAGGATTCTGAGTGCCCCCTCCTCCAATAGGC  
TGAGCATCCACCTATATAGTTTTAATTTTCATCAATCCATTTAACTATCGTTA  
ATTGTTGTACATAGGATTCTGCCGTTTTTAACAATGCAGGATAATAAGATG  
AAAAAAATGTTGTTTTCTGCCGCTCTGGCAATGCTTATTACAGGATGTGCTC  
AACAGACGTTTACTGTTGGAAACAAACCGACAGCAGTAACACCAAAGGAA  
ACCATCACCCATCACTTCTTCGTTTCGGGAATTGGACAGGAGAAAACCTGTT  
GATGCAGCCAAAATTTGTGGCGGCGCAGAAAATGTTGTTAAAACAGAAAC  
CCAGCAAACATTCGTAAATGGATTGCTCGGTTTTTATTACTTTAGGCATTTATA  
CTCCGCTGGAAGCGCGTGTGTATTGCTCACATAATTGCATGAGTTGCCCAT

CGATATGGGCAGCTCTATCTGCACTGCTCATTAATATACTTCTGGGGCTCCTTC  
CAGTTGTTTTTGCATAGTGATCAGCCTCTCTCTGAGGGTGAAATAATCCCGT  
TCAGCGGTGTCTGCCAGTCGGGGGGAGGCTGCATTATCCACGCCGGAGGC  
GGTGGTGGCTTCACGCACTGACTGACAGACTGCTTTGATGTGCAACCGAC  
GACGACCAGCGGCAACATCATCACGCAGAGCATCATTTTCAGCTTTCGCAT  
CAGCTAACTCCTTCGTGTATTTTGCATCGAGCGCAGCAACATCACGCTGAC  
GCATCTGCATGTCAGTAATTGCCGCGTTCGCCAGCTTCAGTTCTCTGGCATT  
TTTGTCGCGCTGGGCTTTGTAGGTAATGGCGTTATCACGGTAATGATTAACA  
GCCCATGACAGGCCGACGATGATGCAGATAACCAGAGCGGAGATAATCGC  
GGTTACTCTGTTTCATTGCTGACCCCAAAACAGATTTACGCTCAATCTCAC  
GACGAGTCATCAGGCCTTCCATTGCTTACCGCCAGCATATGTCCAGCGAC  
GTAGCTGATCACATGCGCCTTTGATATCGCCCTGGTTTATTTTGCGAAGAAG  
CGTCGATGTTCTGAAATTGCCAGCACCCACGTTGTAAACGAATGAGTAAAG  
AGCGCCGCGCATTGTTTCCGGTATATCGACTTTGATGTACGGGTAAATTTGT  
CTGGCGACCGTGGCAAGGTCTTTATTCAGGAGGGCTTTGCATTCTGCTTTG  
GTATACGTTTTACCGAGCATGATGTCTTTTCTGTATGCCCGTGACATACAGT  
CCATACACCAACAATATCTTTGTATGGTATGTAGCTGACACCTTCCAGACCA  
TCGTTACCACTTGGGCCAGTAATTAACACTGATGCTATAGCAATTGCTCCGC  
CACCAATAGCAGCAGCAACGGCTTTTCGTAATGATGGAGGCATTATTCACCT  
CTCGCAGCCTTGCCTTATCTTCTTTAATCTTGAAATAAAGGTTTGTGAGGT  
ACGTCAGCAGGCCAAATACCAGGCTACCCAGCACACCTATTGCTGCCCACT  
GTGAGGGCGTGACTTTATCGAGCAGCTGTAAAAACCAGTAACCGGCACTA  
CCTGCTGAGGTGCCATAGGCGACACCCGTTGTAACTTATCCATGGATTTC  
TAACCCACCTCGCAGACAAAGCGGGTGTAAATTGAGGGAATACAACGTAT  
CGCAAAAAGCAGAAACGTAACAGACTCGGAGTCAGTGAATAACTCAGGT  
ATTGAGTTATCAGCTAATATCGAGACTCAAAAATGGAAAAACCAGCTCGA  
CGGCGGGTTTAAAGCTGTGTGACGAAGTAACCACTCTTAACAGCATAACCAA  
TTTTTTACGTACGTAAACCACTGAATGATATTTATGAGAATGCTACCGAGTG  
TTCAAAACACCACCACAAATACATAAGAAAACCTCAACAAATAACCAATA  
ATAATTCAGACGTTATTTTTAGTTGATTTAAATTAAACTGCCGAATTATAGA  
ACCTCCATAAATAACAACCATTAATATAAATTAGCTAATAGGTTTATTTTTGT  
TCAAATAAGAGCCATAAATAGGTTTCGATAGAAAAAGTTCAGATAAAAATA  
GAGATCTACTTCACAAATTAATGAGAAACTAAAACCTTACATCTTGAAATAA  
TCACATTGATTAGATGAATATTTATCGCGCAGTGACATCATTTTTTAATAATA  
GTTCAAAAAAAGGGCTCACGATGAAAAAATTAACAGTGGCAATTTCTGC  
TGTAGCTGCATCAGTACTGATGGCGATGTCTGCTCAGGCAGCTGAAATTTAT  
AATAAAGACAGTAACAAGCTGGATCTGTACGGGAAAGTTAATGCCAAGCA  
CTACTTCTCCTCTAATGATGCAGATGATGGTGATACTACTTATGCCCGTCTTG  
GCTTCAAAGGTGAAACCCAAATCAACGATCAACTGACTGGTTTCGGTCAG  
TGGAATATGAATTCAAAGGCAACCGCGCTGAATCTCAAGGTTCCCTCCAAA  
GACAAAACCCGTCTTGCATTTGCAGGCCTGAAATTCGGTGACTACGGCTCA  
ATCGATTACGGCCGTAACACTACGGTGTAGCATAACGACATCGGTGCGTGGACT  
GACGTTCTGCCAGAATTCGGTGGCGATACCTGGACCCAAACAGATGTGTTT  
ATGACTGGTTCGCACCACTGGTGTGCAACCTATCGTAACAACGACTTCTTT

GGTCTGGTTGATGGTCTGAACTTTGCTGCTCAGTACCAAGGCAAAAACGAT  
CGTAGCGATTTGATAACTACTGAAGGTAACGGTGATGGCTTCGGTTTCT  
CTGCTACCTATGAATACGAAGGATTCGGTATCGGTGCAACTTATGCGAAATC  
TGATCGTACCGACTCAAGTTAATGCAGGGAAAGTTCTTCCTGAAGTATT  
TGCTTCCGGTAAAAATGCAGAAGTTTGGGCCGCAGGTCTGAAATATGACGC  
TAACAACATTTACCTGGCCACTACCTATTCTGAAACCCAGAATATGACTGTA  
TTTGCTGATCACTTCGTTGCTAATAAAGCCAAAACCTTCGAAGCTGTTGCA  
CAATATCAGTTCGATTTTCGGTCTGCGTCCGTCCGTTGCTTACCTGCAATCTA  
AAGGTAAAGATCTTGGAGTATGGGGCGATCAGGACTTAGTCAAATATGTTG  
ATGTAGGTGCAACCTATTACTTCAACAAAATATGTCTACTTTCGTTGATTAC  
AAAATCAACCTGCTTGACAAAATGACTTCACTAAAGCACTCGGTGTAAGC  
ACTGATGACATCGTTGCTGTAGGTCTGGTTTACCAGTTCTAATCTGATTACG  
AAAAGATATGTTGCGGGAGGCGTTGCCTCCCCAACATATAAGTGGCTCCC  
TCAAGCCACTTCCTTTAGAAGCACACCTTGCTTCTAACTATATAAACCTTC  
TGTTATATATTACCCTTTATTTTTGGGGGCGTTTCAACGCCCATTTTTAATAA  
TTTTTAGTAAACAATTGGCATATTAATTAGAGTTATTAACAACGATATCCATC  
TCTAACCGGATATCTAATGCCATTAACATCCCTTCAATTATGCCCTCAGCCTT  
CTGTAACCTTTTCCCGATATAACCATCAGAGCAGCAATGCTTACCTGCCAGT  
GACATGAATGTCATACCGACTACATAATAATCTACTAATAAATCGTGCAAATC  
GCTGTTGTTCTTTTTCAGACGGGCCATGCACCCGCAAATAATCATCGCGTCA  
TCGTCACAACATTGCGGGCGAGATTTTACTTTTTGAAGTAATTAATCCCTTAA  
AACCGGCGGCAATGGACGACCAGGTCACATCTTCATGATTATTAGCCGCC  
ACGCTCCCCAACGCTCAAGAACCATCTGAATATCACGCATCAACTTACTCC  
ACAAAAATCAGACCAGAACGCCAATTACAAGCAAAAATCAACGAAACAGT  
ATTAGTTGATTGTTATCTCTGACTTCATACTCCTGCTCCTGTCAGGGTTTTGG  
CGTAATTCTTCAGTATTCGGTAATCGGTCAAAAACAGAACCGGGGAAACGAT  
ATAAGCGCAGACGCCCCAGCGGTGGCGAAGACGTTCTGCCATATAAACT  
CAAACATCATTCAATCCCCATTTTCGGTGATTTTTATTCCAAGCCGTCCGCCTG  
GTACTTTCACACCACGAATTACGCGAATGTCATCGAATTGCTCGTCGTCTTC  
CGCAAATCCGGCGTGGATAAGGGAGTCGAGTAAACCTTTCAGGATGTTATC  
GAGGTCGCGGCGGCGGGAGTCTGGAACGTCTGCGATGACTTTGATGCGGA  
GTCGTGATTTGGTGAAAATGTCTAACTTGAGTTGGCGGATGATTTGCTGTAC  
ATCTTTTCGGTATTTCTGGCCTTTATCGCTGATGTAGTATTGGCTTCCCCGTC  
TTCGCCAGTAGGTGTTTCAGCGACGGTGGGTATGGAAGCACAACTGATATT  
CGTTCATTGGACAAACACCCTCCCATTTGTTAACCAATTTTTTAAGGGTAAGC  
ACAATGGCCCGATCCATTTACGCCCTTCGCTCTTCCCTGTTTCATATCTCTCCC  
ATTATCAATTCTTGAATGACAATCAACACATAGCGCAGCAGTAAGGCAATCA  
TCTACTTTAATCCCAACCCCTTCCCTTCATTTCTGTGAGCGGCCTGAACTC  
CGTATCTTCCGCAAAGAACGCAAATTCATATCCCTGACTGCCTGAAGCC  
ATTTACTGCTCCGGTATATTGCCATCTGAGATATCTCCGTTCCGGATCACGATA  
AATCAGCCATTCATCCACGCATTCAGAACATGCGTAGGTTTCTCTGGCGTT  
AGTTCCTTCGTGCAGCCGGCGCACAGCGTTCGACGTATGCTCTGCTGCTCG  
TACTCTTGAGGCCATGGGG
